# Supplementary material for: Analysis of the Quantitative Evaluation of the Public Medical and Health System Costs During Pandemic Governance: Investigation Based on COVID-19
Source: Front Public Health. 2022 Jul 13;10:942043. doi: 10.3389/fpubh.2022.942043 (PMC9326215; doi:10.3389/fpubh.2022.942043)
Supplement: Supplementary file 1 [file Table_1.XLSX]

## Sheet: All_Data_Readable
1	124.238.24.191			2019-07-18 10:49:28	2019-07-18 10:55:57	Chrome 66.0.3359.126	Android Linux 7.0	6分29秒	正常完成	比较认同	一般	比较认同	一般	比较不认同	一般	比较不认同	比较认同	比较不认同	一般	比较不认同	一般	一般	比较认同	比较认同	比较认同	比较认同	比较不认同	不认同	比较不认同	比较不认同	不认同	非常不认同	比较认同	一般	男	31~40岁	城镇	21-30年	比较不满意	比较愿意	大学专科	企业单位	4-6万
2	117.136.54.64			2019-07-18 11:45:39	2019-07-18 11:48:03	Unknown Browser	iPhone iOS 12.3.1	2分24秒	正常完成	比较认同	比较认同	一般	比较不认同	一般	比较不认同	一般	比较认同	比较不认同	一般	一般	比较认同	比较不认同	比较认同	比较不认同	不认同	比较不认同	不认同	非常不认同	不认同	一般	一般	比较认同	认同	比较不认同	男	31~40岁	城镇	21-30年	比较满意	比较愿意	大学本科	事业单位	7-9万
3	60.24.140.68			2019-07-18 13:55:01	2019-07-18 13:58:40	Chrome 39.0.2171.95	Windows Wechat	3分39秒	正常完成	一般	一般	一般	认同	认同	一般	认同	认同	认同	一般	一般	认同	认同	认同	认同	一般	一般	一般	比较不认同	比较不认同	认同	认同	一般	一般	一般	男	18岁-30岁	城镇	10年及以下	不满意	愿意	硕士研究生及以上	社会团体	3万及以下
4	117.136.47.149			2019-07-18 14:01:23	2019-07-18 14:04:07	Chrome 67.0.3396.87	Android Linux 9	2分44秒	正常完成	一般	比较不认同	一般	比较不认同	不认同	不认同	不认同	一般	不认同	不认同	不认同	一般	比较不认同	不认同	一般	不认同	比较不认同	一般	非常不认同	认同	一般	一般	非常不认同	非常不认同	非常认同	男	18岁-30岁	城镇	10年及以下	一般	比较愿意	硕士研究生及以上	企业单位	13万及以上
5	223.72.52.253			2019-07-18 14:10:20	2019-07-18 14:12:54	Opera	Android Linux 8.0.0	2分34秒	正常完成	非常不认同	非常不认同	非常不认同	非常不认同	非常不认同	非常不认同	非常不认同	非常不认同	非常不认同	非常不认同	非常不认同	非常不认同	非常不认同	非常不认同	非常不认同	非常不认同	非常不认同	非常不认同	非常不认同	非常不认同	非常不认同	非常不认同	非常不认同	非常不认同	非常不认同	男	18岁-30岁	城镇	10年及以下	非常不满意	非常不愿意	硕士研究生及以上	企业单位	13万及以上
6	118.78.36.142			2019-07-18 14:18:19	2019-07-18 14:21:32	Unknown Browser	iPhone iOS 10.3.3	3分13秒	正常完成	一般	一般	比较不认同	一般	一般	一般	比较不认同	一般	一般	一般	一般	一般	一般	一般	一般	一般	一般	一般	一般	一般	比较不认同	一般	比较不认同	比较认同	一般	女	18岁-30岁	城镇	11-20年	一般	比较愿意	大学本科	自由个体	10-12万
7	111.33.78.6			2019-07-18 14:19:09	2019-07-18 14:24:32	Chrome 39.0.2171.95	Windows Wechat	5分23秒	正常完成	比较认同	比较不认同	比较认同	一般	比较认同	一般	一般	一般	一般	比较认同	比较认同	一般	比较认同	一般	比较认同	比较不认同	一般	一般	比较不认同	比较不认同	一般	一般	比较不认同	比较不认同	非常认同	男	18岁-30岁	城镇	10年及以下	比较不满意	比较愿意	硕士研究生及以上	无业其他	3万及以下
8	202.113.13.134			2019-07-18 14:22:26	2019-07-18 14:25:43	Chrome 66.0.3359.126	Android Linux 7.0	3分17秒	正常完成	一般	一般	一般	一般	一般	比较不认同	一般	比较不认同	不认同	比较不认同	不认同	一般	比较不认同	比较不认同	比较不认同	一般	比较不认同	比较不认同	不认同	不认同	不认同	比较不认同	比较不认同	比较不认同	一般	女	41~50岁	农村	21-30年	一般	一般	硕士研究生及以上	机关单位	7-9万
9	124.64.19.98			2019-07-18 14:28:02	2019-07-18 14:31:24	Unknown Browser	iPhone iOS 12.2	3分22秒	正常完成	一般	比较不认同	一般	一般	不认同	一般	一般	一般	一般	一般	一般	比较不认同	一般	一般	比较不认同	一般	一般	一般	一般	一般	比较不认同	比较不认同	非常不认同	一般	比较不认同	男	18岁-30岁	城镇	11-20年	一般	一般	大学本科	企业单位	13万及以上
10	60.222.209.199			2019-07-18 14:27:39	2019-07-18 14:31:40	Chrome 66.0.3359.126	Android Linux 6.0.1	4分1秒	正常完成	一般	一般	一般	一般	认同	一般	认同	认同	一般	一般	一般	认同	一般	一般	一般	认同	认同	认同	不认同	不认同	认同	认同	认同	非常认同	不认同	女	41~50岁	城镇	40年以上	一般	愿意	大学专科	事业单位	4-6万
11	118.73.122.229			2019-07-18 14:27:18	2019-07-18 14:31:40	Unknown Browser	iPhone iOS 12.3.1	4分22秒	正常完成	比较认同	一般	比较认同	比较认同	一般	一般	比较不认同	认同	比较不认同	一般	比较认同	认同	一般	认同	认同	一般	一般	一般	认同	非常认同	比较认同	非常认同	不认同	非常认同	不认同	男	31~40岁	农村	31-40年	非常满意	非常愿意	大学专科	自由个体	4-6万
12	180.155.11.93			2019-07-18 14:30:45	2019-07-18 14:31:56	Unknown Browser	iPhone iOS 12.3.1	1分11秒	正常完成	比较不认同	比较不认同	非常不认同	不认同	非常不认同	不认同	非常不认同	非常不认同	非常不认同	不认同	比较不认同	一般	比较不认同	非常不认同	比较不认同	非常不认同	比较不认同	比较不认同	比较不认同	比较不认同	不认同	不认同	不认同	不认同	比较不认同	男	18岁-30岁	城镇	10年及以下	比较不满意	愿意	硕士研究生及以上	企业单位	13万及以上
13	119.39.248.82			2019-07-18 14:33:38	2019-07-18 14:34:55	Unknown Browser	iPhone iOS 10.1.1	1分17秒	正常完成	非常不认同	非常不认同	非常不认同	非常不认同	非常不认同	非常不认同	非常不认同	非常不认同	非常不认同	非常不认同	非常不认同	非常不认同	非常不认同	非常不认同	非常不认同	非常不认同	非常不认同	非常不认同	非常不认同	非常不认同	非常不认同	非常不认同	非常不认同	非常不认同	非常不认同	男	31~40岁	农村	21-30年	非常不满意	非常不愿意	大学本科	自由个体	13万及以上
14	218.26.54.183			2019-07-18 14:32:28	2019-07-18 14:35:44	Chrome 66.0.3359.126	Android Linux 8.0.0	3分16秒	正常完成	一般	比较不认同	一般	一般	比较不认同	一般	比较不认同	比较不认同	一般	一般	一般	比较不认同	一般	一般	一般	一般	比较不认同	一般	比较认同	一般	一般	比较认同	比较不认同	比较不认同	一般	女	18岁-30岁	城镇	21-30年	一般	愿意	大学本科	机关单位	4-6万
15	223.104.7.122			2019-07-18 14:34:59	2019-07-18 14:39:11	Chrome 66.0.3359.126	Android Linux 9	4分12秒	正常完成	认同	认同	认同	认同	认同	认同	认同	认同	认同	认同	认同	认同	认同	认同	认同	认同	认同	认同	认同	认同	认同	认同	认同	认同	认同	男	18岁-30岁	城镇	10年及以下	满意	愿意	硕士研究生及以上	事业单位	3万及以下
16	183.200.108.111			2019-07-18 14:32:01	2019-07-18 14:43:22	Chrome 66.0.3359.126	Android Linux 9	11分21秒	正常完成	一般	比较认同	比较不认同	比较认同	比较不认同	比较不认同	不认同	比较不认同	一般	比较不认同	一般	比较不认同	比较不认同	一般	一般	比较不认同	比较不认同	比较不认同	非常不认同	不认同	比较不认同	比较不认同	非常不认同	不认同	认同	女	41~50岁	农村	40年以上	不满意	愿意	高中/中专/技校	务农	3万及以下
17	120.208.17.177			2019-07-18 14:48:43	2019-07-18 14:52:08	Chrome 66.0.3359.126	Android Linux 8.1.0	3分25秒	正常完成	一般	一般	一般	一般	一般	一般	一般	一般	一般	比较认同	比较认同	一般	一般	一般	一般	比较认同	认同	比较认同	一般	一般	一般	比较认同	一般	一般	一般	男	41~50岁	农村	40年以上	一般	一般	高中/中专/技校	自由个体	3万及以下
18	183.202.186.185			2019-07-18 14:48:47	2019-07-18 14:54:42	Chrome 66.0.3359.126	Android Linux 5.0.2	5分55秒	正常完成	比较认同	认同	认同	比较认同	一般	一般	一般	一般	认同	认同	认同	比较认同	比较不认同	认同	认同	认同	比较认同	认同	认同	认同	认同	认同	一般	一般	不认同	女	41~50岁	城镇	21-30年	比较不满意	愿意	大学本科	事业单位	4-6万
19	123.174.87.85			2019-07-18 14:54:07	2019-07-18 14:56:50	Chrome 67.0.3396.87	Android Linux 9	2分43秒	正常完成	一般	比较认同	比较认同	比较认同	一般	一般	一般	比较不认同	不认同	一般	一般	一般	一般	一般	不认同	不认同	比较不认同	一般	一般	不认同	一般	一般	认同	比较认同	比较不认同	男	31~40岁	城镇	11-20年	一般	愿意	高中/中专/技校	自由个体	3万及以下
20	117.136.4.255			2019-07-18 14:51:40	2019-07-18 14:58:40	Unknown Browser	iPhone iOS 12.3.1	7分0秒	正常完成	一般	比较认同	一般	比较认同	一般	比较不认同	一般	一般	一般	一般	一般	比较认同	一般	比较认同	比较认同	一般	一般	比较不认同	一般	比较不认同	一般	比较认同	比较不认同	一般	非常不认同	女	18岁-30岁	城镇	21-30年	一般	比较愿意	大学专科	企业单位	4-6万
21	117.136.0.131			2019-07-18 14:06:10	2019-07-18 15:01:48	Unknown Browser	iPhone iOS 12.3.1	55分38秒	正常完成	不认同	不认同	不认同	比较不认同	比较不认同	比较不认同	一般	比较不认同	比较不认同	比较不认同	比较不认同	比较不认同	不认同	比较不认同	比较不认同	比较不认同	比较不认同	比较不认同	比较不认同	比较不认同	不认同	一般	比较不认同	比较认同	不认同	女	18岁-30岁	城镇	10年及以下	不满意	不愿意	硕士研究生及以上	企业单位	13万及以上
22	183.202.186.217			2019-07-18 14:59:29	2019-07-18 15:05:05	Chrome 66.0.3359.126	Android Linux 7.1.2	5分36秒	正常完成	不认同	一般	不认同	比较不认同	不认同	一般	一般	不认同	一般	一般	比较认同	一般	一般	比较认同	一般	认同	比较不认同	一般	不认同	不认同	不认同	一般	不认同	认同	不认同	女	18岁-30岁	城镇	10年及以下	比较满意	比较愿意	高中/中专/技校	无业其他	3万及以下
23	223.104.185.102			2019-07-18 15:09:01	2019-07-18 15:11:47	Chrome 66.0.3359.126	Android Linux 8.1.0	2分46秒	正常完成	一般	比较不认同	不认同	不认同	不认同	不认同	非常不认同	不认同	不认同	不认同	不认同	不认同	不认同	不认同	非常不认同	不认同	不认同	不认同	非常不认同	不认同	非常不认同	非常不认同	非常不认同	非常不认同	非常不认同	女	18岁-30岁	农村	21-30年	不满意	不愿意	硕士研究生及以上	无业其他	3万及以下
24	218.26.55.71			2019-07-18 15:01:43	2019-07-18 15:12:32	Unknown Browser	iPhone iOS 12.3.1	10分49秒	正常完成	比较认同	一般	一般	比较不认同	比较不认同	一般	一般	一般	不认同	一般	一般	不认同	一般	一般	不认同	不认同	一般	一般	不认同	一般	比较不认同	比较不认同	比较不认同	比较认同	不认同	女	51~60岁	城镇	40年以上	比较不满意	比较愿意	大学专科	事业单位	7-9万
25	218.68.108.151			2019-07-18 15:10:59	2019-07-18 15:13:19	Unknown Browser	iPhone iOS 12.3.1	2分20秒	正常完成	非常认同	认同	比较不认同	比较认同	比较认同	认同	比较认同	比较不认同	比较不认同	比较认同	比较认同	比较认同	比较认同	比较不认同	比较不认同	比较认同	一般	比较不认同	不认同	比较不认同	比较不认同	比较不认同	不认同	比较不认同	比较认同	女	18岁-30岁	城镇	10年及以下	比较不满意	比较愿意	硕士研究生及以上	无业其他	3万及以下
26	60.222.105.240			2019-07-18 15:12:22	2019-07-18 15:13:47	Unknown Browser	iPhone iOS 10.3.2	1分25秒	正常完成	非常认同	非常认同	非常认同	非常认同	非常认同	非常认同	非常认同	非常认同	非常认同	非常认同	非常认同	非常认同	非常认同	非常认同	非常认同	非常认同	非常认同	非常认同	非常认同	非常认同	非常认同	非常认同	非常认同	非常认同	非常不认同	男	31~40岁	城镇	10年及以下	非常满意	非常愿意	大学本科	自由个体	3万及以下
27	60.222.209.62			2019-07-18 15:01:10	2019-07-18 15:14:09	Unknown Browser	iPhone iOS 12.2	12分59秒	正常完成	一般	一般	不认同	比较认同	比较认同	不认同	一般	比较不认同	一般	比较不认同	一般	一般	一般	比较认同	比较不认同	比较认同	不认同	不认同	不认同	比较不认同	一般	一般	比较不认同	认同	比较不认同	女	41~50岁	城镇	21-30年	比较不满意	比较不愿意	高中/中专/技校	事业单位	4-6万
28	60.222.237.89			2019-07-18 15:11:30	2019-07-18 15:14:33	Chrome 66.0.3359.126	Android Linux 9	3分3秒	正常完成	比较认同	认同	认同	认同	认同	认同	认同	比较认同	认同	认同	认同	认同	认同	认同	认同	认同	比较认同	认同	比较认同	比较认同	认同	一般	认同	比较认同	认同	女	31~40岁	农村	11-20年	比较满意	一般	大学本科	事业单位	4-6万
29	124.167.208.29			2019-07-18 15:12:25	2019-07-18 15:15:01	Unknown Browser	iPhone iOS 12.3.1	2分36秒	正常完成	比较不认同	比较不认同	一般	比较认同	一般	比较认同	比较认同	一般	比较认同	一般	一般	一般	比较认同	比较不认同	比较不认同	比较不认同	比较不认同	比较不认同	一般	一般	比较认同	比较认同	一般	一般	比较认同	女	31~40岁	城镇	21-30年	一般	比较愿意	硕士研究生及以上	事业单位	4-6万
30	218.26.54.172			2019-07-18 15:14:11	2019-07-18 15:16:07	Chrome 66.0.3359.126	Android Linux 9	1分56秒	正常完成	一般	一般	一般	比较认同	一般	比较认同	一般	一般	一般	一般	一般	比较认同	一般	比较认同	一般	比较认同	一般	一般	比较认同	一般	一般	一般	一般	一般	比较认同	男	18岁-30岁	农村	21-30年	一般	一般	大学专科	企业单位	3万及以下
31	221.131.42.22			2019-07-18 15:13:46	2019-07-18 15:16:17	Unknown Browser	iPhone iOS 10.2.1	2分31秒	正常完成	认同	认同	比较认同	比较认同	一般	一般	比较认同	比较认同	认同	比较认同	认同	认同	认同	认同	认同	认同	认同	认同	认同	认同	比较认同	比较认同	比较认同	一般	一般	女	18岁-30岁	城镇	10年及以下	比较满意	比较愿意	硕士研究生及以上	机关单位	7-9万
32	60.222.54.30			2019-07-18 15:09:43	2019-07-18 15:17:01	Chrome 66.0.3359.126	Android Linux 9	7分18秒	正常完成	认同	认同	比较认同	认同	认同	非常认同	认同	认同	非常认同	认同	认同	比较认同	非常认同	非常认同	认同	非常认同	非常认同	认同	认同	比较认同	认同	认同	认同	非常认同	认同	男	41~50岁	城镇	21-30年	满意	比较愿意	高中/中专/技校	企业单位	3万及以下
33	183.195.48.121			2019-07-18 15:10:30	2019-07-18 15:17:39	Chrome 66.0.3359.126	Android Linux 9	7分9秒	正常完成	比较认同	认同	比较认同	比较认同	一般	认同	比较认同	认同	一般	一般	比较认同	一般	认同	比较认同	认同	一般	比较认同	认同	认同	认同	一般	比较认同	一般	认同	不认同	男	41~50岁	城镇	11-20年	一般	一般	大学专科	自由个体	7-9万
34	60.222.210.130			2019-07-18 15:12:44	2019-07-18 15:18:04	Unknown Browser	iPhone iOS 9.2.1	5分20秒	正常完成	一般	比较认同	比较不认同	不认同	一般	一般	不认同	比较不认同	比较不认同	一般	一般	比较不认同	比较认同	一般	比较不认同	比较不认同	一般	比较不认同	不认同	不认同	比较不认同	一般	比较不认同	一般	不认同	女	41~50岁	城镇	40年以上	比较不满意	不愿意	大学专科	自由个体	4-6万
35	113.25.87.40			2019-07-18 15:16:42	2019-07-18 15:20:21	Unknown Browser	iPhone iOS 11.4	3分39秒	正常完成	认同	认同	比较认同	比较不认同	比较不认同	一般	一般	认同	认同	认同	一般	一般	比较不认同	比较不认同	比较认同	比较不认同	比较认同	一般	比较认同	比较认同	比较认同	一般	比较认同	一般	比较不认同	男	18岁-30岁	城镇	11-20年	比较满意	愿意	大学本科	自由个体	3万及以下
36	124.165.218.43			2019-07-18 15:18:49	2019-07-18 15:20:38	Chrome 66.0.3359.126	Android Linux 9	1分49秒	正常完成	一般	一般	比较不认同	一般	一般	一般	不认同	不认同	一般	不认同	比较不认同	比较不认同	一般	一般	一般	一般	一般	一般	一般	一般	一般	一般	一般	一般	一般	男	31~40岁	农村	10年及以下	一般	一般	硕士研究生及以上	事业单位	7-9万
37	202.99.203.37			2019-07-18 15:16:21	2019-07-18 15:21:12	Chrome 66.0.3359.126	Android Linux 9	4分51秒	正常完成	比较不认同	比较不认同	比较不认同	一般	一般	一般	比较不认同	比较不认同	比较不认同	不认同	不认同	一般	不认同	一般	一般	一般	不认同	不认同	一般	非常不认同	一般	比较不认同	非常不认同	不认同	非常认同	男	31~40岁	城镇	21-30年	非常不满意	非常愿意	大学专科	自由个体	7-9万
38	117.136.55.130			2019-07-18 14:42:58	2019-07-18 15:21:26	Chrome 66.0.3359.126	Android Linux 8.1.0	38分28秒	正常完成	比较不认同	一般	比较认同	不认同	比较不认同	不认同	一般	比较不认同	比较不认同	比较认同	一般	比较不认同	一般	一般	比较认同	比较认同	一般	一般	比较不认同	比较不认同	一般	比较不认同	不认同	比较认同	比较认同	女	18岁-30岁	城镇	11-20年	一般	愿意	硕士研究生及以上	事业单位	10-12万
39	117.136.90.65			2019-07-18 15:17:28	2019-07-18 15:21:30	Chrome 66.0.3359.126	Android Linux 7.0	4分2秒	正常完成	一般	比较认同	一般	比较认同	一般	比较认同	一般	比较认同	一般	比较不认同	一般	一般	比较认同	比较不认同	比较认同	一般	比较认同	不认同	比较不认同	不认同	认同	一般	比较不认同	比较不认同	比较认同	男	31~40岁	城镇	11-20年	一般	比较不愿意	大学本科	自由个体	10-12万
40	120.208.17.126			2019-07-18 15:15:25	2019-07-18 15:21:32	Unknown Browser	iPhone iOS 8.4.1	6分7秒	正常完成	一般	认同	比较认同	认同	比较认同	一般	比较认同	比较认同	一般	比较认同	比较认同	比较认同	一般	认同	一般	比较认同	一般	认同	比较认同	一般	比较认同	认同	一般	认同	比较不认同	女	18岁-30岁	城镇	21-30年	比较满意	非常愿意	大学本科	企业单位	7-9万
41	112.65.61.139			2019-07-18 15:21:38	2019-07-18 15:23:37	Unknown Browser	iPhone iOS 12.2	1分59秒	正常完成	比较不认同	比较不认同	比较不认同	比较不认同	比较不认同	非常不认同	不认同	不认同	比较不认同	一般	不认同	一般	比较不认同	比较不认同	比较不认同	比较不认同	比较不认同	比较不认同	比较不认同	比较不认同	比较不认同	一般	一般	非常认同	比较认同	女	31~40岁	城镇	10年及以下	比较不满意	不愿意	硕士研究生及以上	企业单位	13万及以上
42	183.200.108.255			2019-07-18 15:19:48	2019-07-18 15:25:14	Unknown Browser	iPhone iOS 12.3.1	5分26秒	正常完成	不认同	不认同	不认同	认同	一般	一般	一般	认同	一般	不认同	不认同	不认同	一般	不认同	不认同	不认同	不认同	非常不认同	非常不认同	非常不认同	一般	一般	非常不认同	认同	非常不认同	男	31~40岁	城镇	21-30年	非常不满意	非常不愿意	大学专科	企业单位	4-6万
43	183.195.48.121			2019-07-18 15:24:38	2019-07-18 15:26:18	Chrome 66.0.3359.126	Android Linux 9	1分40秒	正常完成	认同	比较认同	认同	认同	比较认同	一般	认同	比较认同	一般	认同	认同	一般	比较认同	比较认同	认同	比较认同	认同	一般	认同	比较不认同	一般	不认同	比较认同	一般	认同	女	18岁-30岁	城镇	11-20年	一般	比较愿意	大学本科	无业其他	3万及以下
44	202.99.203.37			2019-07-18 15:23:05	2019-07-18 15:27:03	Unknown Browser	iPhone iOS 12.3.1	3分58秒	正常完成	一般	一般	一般	比较不认同	一般	比较不认同	一般	一般	比较不认同	比较不认同	比较不认同	比较不认同	比较不认同	比较不认同	一般	比较不认同	比较不认同	比较不认同	一般	一般	一般	一般	比较不认同	比较不认同	比较认同	女	18岁-30岁	城镇	21-30年	一般	比较愿意	大学本科	企业单位	7-9万
45	60.222.150.172			2019-07-18 15:18:50	2019-07-18 15:28:13	Chrome 66.0.3359.126	Android Linux 9	9分23秒	正常完成	认同	认同	认同	认同	认同	一般	比较认同	认同	不认同	一般	认同	认同	一般	认同	认同	非常认同	认同	一般	不认同	认同	认同	认同	一般	比较不认同	认同	女	41~50岁	城镇	40年以上	比较满意	比较愿意	高中/中专/技校	务农	3万及以下
46	60.222.237.90			2019-07-18 15:24:08	2019-07-18 15:30:00	Chrome 67.0.3396.87	Android Linux 9	5分52秒	正常完成	一般	一般	一般	比较认同	比较认同	比较认同	一般	比较认同	比较认同	比较认同	比较认同	比较认同	比较认同	一般	比较认同	一般	一般	比较认同	不认同	比较不认同	一般	一般	一般	比较认同	比较认同	女	31~40岁	城镇	21-30年	比较不满意	一般	大学本科	自由个体	4-6万
47	123.174.176.68			2019-07-18 15:27:57	2019-07-18 15:33:39	Unknown Browser	iPhone iOS 12.3.1	5分42秒	正常完成	一般	一般	一般	一般	一般	一般	一般	一般	一般	一般	一般	一般	一般	一般	不认同	一般	不认同	不认同	不认同	不认同	不认同	不认同	一般	认同	比较不认同	女	31~40岁	农村	11-20年	一般	愿意	高中/中专/技校	无业其他	3万及以下
48	60.222.198.51			2019-07-18 15:31:51	2019-07-18 15:34:14	Chrome 66.0.3359.126	Android Linux 7.1.1	2分23秒	正常完成	比较认同	比较认同	比较认同	一般	比较不认同	一般	一般	认同	认同	认同	认同	比较认同	比较认同	一般	认同	认同	认同	认同	认同	比较认同	认同	认同	认同	认同	比较认同	女	31~40岁	农村	11-20年	满意	比较愿意	初中	务农	3万及以下
49	117.136.4.231			2019-07-18 15:32:14	2019-07-18 15:35:11	Chrome 66.0.3359.126	Android Linux 7.1.1	2分57秒	正常完成	不认同	不认同	比较不认同	比较不认同	比较不认同	不认同	不认同	非常不认同	不认同	非常不认同	非常不认同	非常不认同	非常不认同	非常不认同	非常不认同	非常不认同	非常不认同	非常不认同	非常不认同	非常不认同	非常不认同	非常不认同	非常不认同	非常不认同	认同	女	31~40岁	农村	11-20年	一般	不愿意	大学专科	自由个体	4-6万
50	218.26.55.125			2019-07-18 15:30:09	2019-07-18 15:36:43	Chrome 66.0.3359.126	Android Linux 9	6分34秒	正常完成	一般	比较不认同	一般	一般	一般	不认同	比较认同	比较不认同	不认同	不认同	不认同	一般	不认同	不认同	不认同	比较不认同	一般	比较不认同	不认同	比较不认同	一般	一般	比较认同	认同	比较认同	男	31~40岁	城镇	31-40年	一般	比较愿意	大学本科	企业单位	4-6万
51	124.126.217.64			2019-07-18 15:34:34	2019-07-18 15:37:29	Unknown Browser	iPhone iOS 12.1.4	2分55秒	正常完成	一般	一般	比较不认同	比较不认同	比较不认同	一般	一般	比较不认同	不认同	比较不认同	比较不认同	不认同	比较不认同	比较不认同	比较不认同	比较不认同	比较不认同	非常不认同	非常不认同	非常不认同	非常不认同	不认同	非常不认同	比较认同	比较不认同	男	18岁-30岁	城镇	10年及以下	一般	比较愿意	大学本科	自由个体	4-6万
52	60.222.104.33			2019-07-18 15:36:43	2019-07-18 15:41:39	Chrome 67.0.3396.87	Android Linux 8.0.0	4分56秒	正常完成	一般	一般	不认同	不认同	非常不认同	不认同	不认同	不认同	不认同	不认同	不认同	不认同	不认同	不认同	比较不认同	不认同	不认同	非常不认同	不认同	不认同	不认同	不认同	不认同	认同	比较不认同	男	31~40岁	城镇	11-20年	比较不满意	愿意	大学本科	机关单位	7-9万
53	123.174.89.102			2019-07-18 15:34:00	2019-07-18 15:41:47	Chrome 66.0.3359.126	Android Linux 6.0.1	7分47秒	正常完成	不认同	非常不认同	一般	不认同	一般	非常不认同	不认同	不认同	不认同	不认同	不认同	一般	不认同	不认同	不认同	不认同	不认同	不认同	不认同	不认同	不认同	不认同	不认同	不认同	认同	男	41~50岁	城镇	21-30年	不满意	愿意	大学专科	机关单位	4-6万
54	183.200.108.155			2019-07-18 15:36:09	2019-07-18 15:42:23	Chrome 72.0.3626.121	Android Linux 9	6分14秒	正常完成	认同	比较认同	认同	比较认同	认同	认同	认同	认同	比较认同	认同	认同	认同	认同	认同	比较认同	认同	认同	认同	比较不认同	一般	比较认同	认同	一般	比较认同	比较认同	男	31~40岁	城镇	21-30年	比较满意	愿意	大学专科	企业单位	4-6万
55	120.244.108.239			2019-07-18 15:44:36	2019-07-18 15:46:03	Chrome 66.0.3359.126	Android Linux 9	1分27秒	正常完成	比较认同	比较认同	一般	比较认同	比较认同	认同	一般	认同	认同	比较认同	比较认同	认同	比较认同	比较认同	认同	比较认同	认同	认同	非常不认同	非常不认同	比较认同	比较认同	不认同	一般	非常不认同	男	18岁-30岁	城镇	21-30年	比较满意	比较愿意	硕士研究生及以上	无业其他	3万及以下
56	117.136.0.195			2019-07-18 15:42:23	2019-07-18 15:49:51	Chrome 66.0.3359.126	Android Linux 8.1.0	7分28秒	正常完成	比较不认同	比较认同	一般	比较认同	认同	一般	一般	一般	比较认同	不认同	比较不认同	不认同	比较认同	一般	认同	一般	比较认同	比较认同	比较不认同	不认同	不认同	比较认同	不认同	比较认同	认同	男	60岁以上	城镇	31-40年	比较满意	比较愿意	大学本科	机关单位	4-6万
57	218.26.55.201			2019-07-18 15:45:29	2019-07-18 15:50:21	Chrome 66.0.3359.126	Android Linux 5.1.1	4分52秒	正常完成	比较不认同	不认同	非常不认同	不认同	不认同	一般	比较不认同	不认同	比较不认同	非常不认同	比较不认同	非常不认同	非常不认同	比较不认同	非常不认同	非常不认同	非常不认同	非常不认同	一般	一般	不认同	非常不认同	比较不认同	比较认同	比较认同	男	31~40岁	农村	11-20年	非常不满意	非常不愿意	高中/中专/技校	务农	3万及以下
58	123.174.176.68			2019-07-18 15:49:20	2019-07-18 15:51:47	Unknown Browser	iPhone iOS 12.3.1	2分27秒	正常完成	一般	一般	一般	一般	一般	一般	一般	一般	一般	一般	一般	不认同	不认同	不认同	不认同	不认同	不认同	不认同	不认同	不认同	不认同	不认同	不认同	认同	不认同	女	31~40岁	农村	11-20年	一般	愿意	高中/中专/技校	无业其他	3万及以下
59	117.136.55.141			2019-07-18 15:52:32	2019-07-18 15:53:38	Unknown Browser	iPhone iOS 11.2.5	1分6秒	正常完成	不认同	不认同	不认同	不认同	不认同	非常不认同	不认同	非常不认同	不认同	不认同	非常不认同	非常不认同	不认同	非常不认同	不认同	不认同	非常不认同	非常不认同	非常不认同	比较不认同	不认同	不认同	比较不认同	不认同	不认同	男	18岁-30岁	城镇	21-30年	比较不满意	非常不愿意	硕士研究生及以上	企业单位	10-12万
60	117.136.55.114			2019-07-18 15:49:40	2019-07-18 15:55:02	Chrome 66.0.3359.126	Android Linux 8.1.0	5分22秒	正常完成	比较认同	一般	认同	比较不认同	不认同	认同	不认同	认同	一般	比较不认同	不认同	认同	不认同	不认同	不认同	比较不认同	比较不认同	不认同	不认同	不认同	不认同	不认同	不认同	不认同	不认同	男	18岁-30岁	农村	11-20年	比较不满意	不愿意	硕士研究生及以上	事业单位	4-6万
61	117.136.90.130			2019-07-18 15:55:19	2019-07-18 15:57:14	Unknown Browser	iPhone iOS 12.3.1	1分55秒	正常完成	认同	认同	比较认同	比较认同	比较认同	比较认同	比较认同	比较认同	一般	一般	比较认同	比较认同	比较认同	比较认同	一般	比较认同	一般	比较认同	一般	一般	一般	比较认同	一般	不认同	认同	女	18岁-30岁	城镇	10年及以下	比较满意	比较愿意	硕士研究生及以上	机关单位	10-12万
62	218.26.54.100			2019-07-18 15:58:05	2019-07-18 15:59:49	Chrome 66.0.3359.126	Android Linux 7.1.2	1分44秒	正常完成	一般	一般	一般	一般	一般	一般	一般	一般	一般	一般	一般	一般	一般	一般	一般	一般	一般	一般	一般	一般	一般	一般	一般	一般	一般	女	18岁-30岁	农村	10年及以下	一般	一般	大学专科	事业单位	3万及以下
63	117.136.90.169			2019-07-18 15:56:03	2019-07-18 16:00:04	Chrome 66.0.3359.126	Android Linux 9	4分1秒	正常完成	一般	不认同	不认同	不认同	不认同	不认同	比较不认同	一般	比较认同	一般	比较不认同	比较不认同	一般	一般	一般	一般	一般	一般	一般	一般	比较不认同	比较不认同	比较不认同	比较不认同	一般	女	31~40岁	城镇	11-20年	非常不满意	不愿意	大学专科	企业单位	4-6万
64	117.14.201.31			2019-07-18 15:42:18	2019-07-18 16:00:09	Unknown Browser	iPhone iOS 11.4.1	17分51秒	正常完成	非常不认同	不认同	一般	比较不认同	比较不认同	比较认同	比较认同	不认同	非常不认同	不认同	比较不认同	一般	非常不认同	非常不认同	比较不认同	不认同	一般	非常不认同	比较不认同	一般	一般	非常不认同	非常不认同	比较认同	不认同	女	51~60岁	城镇	40年以上	一般	比较愿意	高中/中专/技校	企业单位	3万及以下
65	202.99.203.37			2019-07-18 15:57:07	2019-07-18 16:02:33	Unknown Browser	iPhone iOS 12.3.1	5分26秒	正常完成	一般	一般	一般	一般	比较不认同	认同	比较认同	比较认同	比较认同	一般	比较认同	比较不认同	不认同	比较认同	一般	不认同	比较不认同	比较不认同	一般	一般	一般	比较认同	不认同	一般	非常认同	男	31~40岁	城镇	10年及以下	一般	非常愿意	硕士研究生及以上	企业单位	10-12万
66	60.222.65.178			2019-07-18 16:01:33	2019-07-18 16:06:08	Chrome 66.0.3359.126	Android Linux 8.0.0	4分35秒	正常完成	一般	不认同	不认同	不认同	不认同	不认同	不认同	不认同	比较不认同	一般	一般	一般	一般	认同	认同	一般	一般	不认同	一般	不认同	不认同	一般	不认同	认同	认同	女	41~50岁	城镇	40年以上	不满意	愿意	大学专科	事业单位	4-6万
67	171.118.44.85			2019-07-18 16:18:25	2019-07-18 16:20:40	Chrome 66.0.3359.126	Android Linux 7.0	2分15秒	正常完成	一般	一般	比较不认同	比较不认同	比较不认同	比较不认同	比较不认同	比较不认同	比较不认同	比较不认同	比较不认同	比较不认同	比较认同	比较不认同	比较不认同	比较不认同	比较不认同	比较不认同	一般	一般	一般	一般	非常不认同	非常认同	一般	男	18岁-30岁	城镇	11-20年	一般	愿意	硕士研究生及以上	机关单位	10-12万
68	117.136.90.52			2019-07-18 16:20:06	2019-07-18 16:23:40	Chrome 66.0.3359.126	Android Linux 7.1.1	3分34秒	正常完成	一般	一般	比较认同	比较认同	比较不认同	比较认同	比较认同	比较认同	一般	一般	比较认同	比较不认同	一般	比较不认同	比较认同	比较不认同	一般	比较认同	比较不认同	比较不认同	比较不认同	一般	比较不认同	认同	比较不认同	女	18岁-30岁	城镇	11-20年	一般	比较愿意	硕士研究生及以上	企业单位	10-12万
69	60.222.53.128			2019-07-18 16:23:57	2019-07-18 16:28:43	Chrome 66.0.3359.126	Android Linux 7.0	4分46秒	正常完成	比较认同	比较认同	比较认同	比较认同	比较认同	认同	比较认同	比较认同	认同	认同	比较认同	认同	认同	比较认同	比较认同	比较认同	认同	比较认同	不认同	不认同	比较认同	认同	比较认同	一般	认同	女	18岁-30岁	城镇	11-20年	一般	比较愿意	大学专科	企业单位	3万及以下
70	183.227.121.41			2019-07-18 16:33:27	2019-07-18 16:36:02	Chrome 39.0.2171.95	Windows Wechat	2分35秒	正常完成	一般	一般	一般	一般	一般	一般	一般	一般	一般	一般	一般	一般	一般	一般	一般	比较不认同	一般	比较不认同	非常不认同	非常不认同	一般	不认同	不认同	认同	不认同	男	31~40岁	城镇	11-20年	不满意	不愿意	硕士研究生及以上	企业单位	10-12万
71	183.185.215.122			2019-07-18 16:35:33	2019-07-18 16:36:47	Chrome 66.0.3359.126	Android Linux 9	1分14秒	正常完成	非常认同	非常认同	非常认同	非常认同	非常认同	非常认同	非常认同	非常认同	非常认同	非常认同	非常认同	非常认同	非常认同	非常认同	非常认同	非常认同	非常认同	非常认同	非常认同	非常认同	非常认同	非常认同	非常认同	非常认同	非常认同	男	18岁-30岁	城镇	21-30年	非常满意	非常愿意	大学本科	机关单位	3万及以下
72	218.26.55.232			2019-07-18 16:24:00	2019-07-18 16:37:13	Chrome 66.0.3359.126	Android Linux 8.0.0	13分13秒	正常完成	一般	一般	比较认同	比较认同	比较认同	不认同	不认同	一般	一般	一般	一般	比较不认同	一般	一般	不认同	不认同	比较不认同	不认同	不认同	一般	一般	一般	不认同	一般	比较认同	男	41~50岁	城镇	31-40年	一般	愿意	大学专科	机关单位	4-6万
73	210.82.53.196			2019-07-18 16:32:00	2019-07-18 16:39:01	Chrome 66.0.3359.126	Android Linux 7.0	7分1秒	正常完成	不认同	不认同	不认同	不认同	一般	一般	一般	一般	不认同	一般	不认同	一般	一般	不认同	不认同	不认同	不认同	不认同	不认同	不认同	不认同	一般	非常不认同	不认同	不认同	女	41~50岁	农村	31-40年	一般	一般	初中	务农	3万及以下
74	61.181.236.202			2019-07-18 16:38:27	2019-07-18 16:39:49	Unknown Browser	iPhone iOS 12.3.1	1分22秒	正常完成	认同	比较认同	认同	认同	认同	比较认同	认同	认同	认同	认同	认同	非常认同	认同	认同	认同	认同	认同	比较认同	认同	认同	认同	认同	认同	认同	认同	男	18岁-30岁	城镇	11-20年	一般	愿意	硕士研究生及以上	机关单位	3万及以下
75	115.156.143.252			2019-07-18 16:37:25	2019-07-18 16:41:14	Unknown Browser	iPhone iOS 10.3.3	3分49秒	正常完成	一般	比较不认同	一般	比较不认同	不认同	一般	比较不认同	比较认同	比较认同	一般	比较不认同	不认同	一般	比较不认同	一般	不认同	不认同	比较不认同	非常不认同	不认同	一般	一般	比较不认同	一般	不认同	女	31~40岁	城镇	31-40年	一般	比较愿意	大学本科	事业单位	4-6万
76	171.120.222.58			2019-07-18 16:36:50	2019-07-18 16:41:16	Unknown Browser	iPhone iOS 12.3.1	4分26秒	正常完成	一般	一般	比较认同	比较认同	比较不认同	一般	比较不认同	一般	比较不认同	比较不认同	比较认同	比较认同	比较认同	一般	比较不认同	认同	一般	不认同	比较认同	比较认同	一般	一般	不认同	比较认同	一般	女	31~40岁	城镇	21-30年	一般	比较愿意	硕士研究生及以上	事业单位	4-6万
77	218.26.55.13			2019-07-18 16:43:37	2019-07-18 16:45:23	Unknown Browser	iPhone iOS 12.3.1	1分46秒	正常完成	比较认同	比较认同	认同	比较认同	比较认同	比较认同	比较认同	认同	比较认同	比较认同	比较认同	比较认同	比较认同	比较认同	比较认同	比较认同	比较认同	认同	认同	认同	认同	认同	认同	认同	认同	男	18岁-30岁	城镇	10年及以下	满意	比较愿意	硕士研究生及以上	事业单位	3万及以下
78	218.26.54.106			2019-07-18 16:32:35	2019-07-18 16:47:30	Unknown Browser	iPhone iOS 12.3.1	14分55秒	正常完成	一般	一般	一般	比较不认同	比较不认同	比较认同	比较认同	比较认同	一般	比较不认同	一般	比较不认同	比较不认同	一般	比较不认同	比较认同	比较不认同	一般	非常不认同	非常不认同	比较认同	比较认同	非常不认同	认同	非常不认同	女	31~40岁	城镇	10年及以下	比较满意	比较愿意	硕士研究生及以上	企业单位	4-6万
79	183.202.186.217			2019-07-18 16:46:58	2019-07-18 16:50:25	Chrome 66.0.3359.126	Android Linux 7.1.2	3分27秒	正常完成	非常不认同	非常不认同	非常不认同	非常不认同	非常不认同	非常不认同	不认同	不认同	不认同	不认同	非常不认同	不认同	非常不认同	不认同	非常不认同	不认同	不认同	不认同	非常不认同	不认同	不认同	不认同	不认同	不认同	不认同	女	41~50岁	城镇	21-30年	不满意	比较不愿意	大学本科	无业其他	4-6万
80	223.104.14.126			2019-07-18 16:52:54	2019-07-18 16:54:06	Chrome 66.0.3359.126	Android Linux 9	1分12秒	正常完成	比较认同	一般	一般	比较认同	比较不认同	一般	比较认同	一般	认同	认同	非常认同	一般	比较认同	认同	一般	一般	比较认同	比较不认同	比较不认同	比较认同	比较认同	比较认同	认同	比较认同	比较认同	女	31~40岁	农村	21-30年	比较满意	愿意	硕士研究生及以上	企业单位	7-9万
81	1.68.60.241			2019-07-18 16:53:21	2019-07-18 16:55:26	Unknown Browser	iPhone iOS 12.2	2分5秒	正常完成	比较认同	认同	比较认同	认同	比较认同	一般	认同	认同	一般	比较认同	比较认同	比较认同	比较认同	认同	认同	比较认同	比较认同	比较认同	不认同	一般	比较认同	比较认同	比较认同	比较认同	比较认同	男	18岁-30岁	城镇	21-30年	比较满意	比较愿意	硕士研究生及以上	企业单位	13万及以上
82	117.136.91.176			2019-07-18 16:56:39	2019-07-18 16:59:01	Chrome 66.0.3359.126	Android Linux 9	2分22秒	正常完成	比较不认同	一般	比较不认同	一般	一般	一般	比较不认同	一般	一般	一般	比较不认同	一般	比较不认同	一般	一般	一般	比较不认同	比较不认同	比较不认同	一般	一般	一般	一般	一般	一般	男	31~40岁	农村	10年及以下	一般	一般	硕士研究生及以上	自由个体	13万及以上
83	183.202.189.209			2019-07-18 17:06:17	2019-07-18 17:13:45	Unknown Browser	iPhone iOS 12.3	7分28秒	正常完成	一般	一般	不认同	一般	一般	不认同	不认同	一般	一般	一般	一般	认同	一般	一般	一般	一般	不认同	一般	一般	一般	不认同	一般	一般	一般	一般	女	41~50岁	城镇	10年及以下	一般	一般	高中/中专/技校	事业单位	3万及以下
84	218.26.55.157			2019-07-18 17:18:18	2019-07-18 17:22:16	Chrome 66.0.3359.126	Android Linux 9	3分58秒	正常完成	不认同	不认同	不认同	一般	不认同	不认同	不认同	不认同	不认同	不认同	不认同	不认同	不认同	不认同	不认同	不认同	不认同	不认同	不认同	不认同	不认同	不认同	不认同	一般	不认同	男	51~60岁	城镇	21-30年	不满意	愿意	高中/中专/技校	自由个体	4-6万
85	60.222.103.192			2019-07-18 17:44:56	2019-07-18 17:47:38	Chrome 66.0.3359.126	Android Linux 9	2分42秒	正常完成	认同	一般	认同	比较认同	一般	认同	一般	一般	认同	比较认同	一般	比较认同	认同	比较认同	比较认同	认同	一般	认同	一般	一般	一般	认同	一般	认同	一般	女	41~50岁	城镇	40年以上	一般	愿意	大学本科	企业单位	3万及以下
86	60.222.150.148			2019-07-18 17:40:56	2019-07-18 17:48:46	Chrome 66.0.3359.126	Android Linux 7.1.1	7分50秒	正常完成	比较认同	一般	不认同	非常不认同	非常不认同	不认同	比较认同	一般	不认同	一般	一般	一般	认同	一般	比较认同	不认同	比较不认同	比较认同	不认同	一般	一般	认同	认同	认同	比较不认同	女	41~50岁	城镇	10年及以下	一般	愿意	初中	务农	3万及以下
87	117.136.90.22			2019-07-18 17:51:24	2019-07-18 17:54:04	Unknown Browser	iPhone iOS 10.3.2	2分40秒	正常完成	一般	比较认同	一般	一般	一般	比较认同	一般	一般	一般	一般	一般	一般	比较认同	比较不认同	一般	一般	比较认同	认同	不认同	不认同	一般	一般	一般	一般	非常认同	男	31~40岁	农村	10年及以下	一般	愿意	大学本科	企业单位	3万及以下
88	218.26.54.46			2019-07-18 17:54:54	2019-07-18 17:58:50	Chrome 66.0.3359.126	Android Linux 9	3分56秒	正常完成	认同	认同	比较认同	一般	比较认同	比较认同	认同	一般	一般	一般	认同	认同	认同	认同	一般	比较认同	比较认同	比较认同	比较认同	比较认同	一般	一般	一般	认同	一般	男	41~50岁	城镇	21-30年	一般	一般	初中	企业单位	3万及以下
89	112.224.21.184			2019-07-18 17:58:20	2019-07-18 18:02:53	Chrome 66.0.3359.126	Android Linux 8.1.0	4分33秒	正常完成	一般	比较不认同	一般	不认同	比较不认同	不认同	不认同	一般	一般	一般	一般	不认同	不认同	比较不认同	一般	不认同	不认同	比较不认同	一般	比较不认同	一般	一般	一般	一般	一般	男	31~40岁	城镇	21-30年	不满意	比较愿意	大学专科	企业单位	4-6万
90	60.222.210.130			2019-07-18 18:04:40	2019-07-18 18:10:38	Chrome 66.0.3359.126	Android Linux 8.0.0	5分58秒	正常完成	一般	比较不认同	比较认同	比较不认同	比较不认同	一般	一般	比较不认同	一般	比较不认同	一般	比较不认同	比较认同	一般	比较不认同	一般	比较不认同	比较不认同	比较不认同	比较不认同	一般	一般	比较不认同	一般	比较不认同	男	51~60岁	城镇	21-30年	比较不满意	一般	大学专科	机关单位	4-6万
91	117.136.90.126			2019-07-18 18:24:23	2019-07-18 18:25:49	Chrome 66.0.3359.126	Android Linux 9	1分26秒	正常完成	认同	非常认同	非常认同	认同	认同	非常认同	非常认同	非常认同	认同	比较认同	认同	认同	认同	认同	认同	认同	非常认同	非常认同	非常认同	认同	认同	认同	认同	认同	认同	女	18岁-30岁	城镇	10年及以下	满意	愿意	硕士研究生及以上	企业单位	10-12万
92	117.136.4.243			2019-07-18 18:26:01	2019-07-18 18:27:41	Chrome 66.0.3359.126	Android Linux 8.1.0	1分40秒	正常完成	比较认同	一般	一般	比较不认同	比较认同	一般	一般	一般	比较认同	一般	比较认同	一般	比较认同	一般	比较不认同	一般	一般	一般	一般	比较不认同	比较认同	比较不认同	一般	一般	比较不认同	女	31~40岁	城镇	21-30年	一般	比较不愿意	大学本科	事业单位	4-6万
93	117.136.91.125			2019-07-18 18:23:47	2019-07-18 18:28:38	Chrome 66.0.3359.126	Android Linux 7.0	4分51秒	正常完成	比较不认同	一般	比较认同	一般	比较认同	认同	比较不认同	一般	比较不认同	比较认同	一般	比较认同	一般	比较不认同	比较不认同	比较认同	比较认同	比较认同	比较不认同	比较认同	比较不认同	一般	比较不认同	认同	不认同	男	31~40岁	城镇	11-20年	一般	比较愿意	硕士研究生及以上	机关单位	10-12万
94	183.200.0.38			2019-07-18 18:29:04	2019-07-18 18:31:31	Unknown Browser	iPhone iOS 12.3.1	2分27秒	正常完成	认同	认同	认同	认同	认同	认同	认同	比较认同	认同	比较认同	认同	认同	认同	比较认同	比较认同	比较认同	认同	认同	一般	比较不认同	比较认同	比较认同	比较认同	比较认同	认同	女	18岁-30岁	城镇	11-20年	比较满意	比较愿意	硕士研究生及以上	机关单位	4-6万
95	60.222.198.163			2019-07-18 18:25:43	2019-07-18 18:32:18	Unknown Browser	iPhone iOS 12.3.1	6分35秒	正常完成	一般	一般	比较认同	一般	比较不认同	一般	一般	一般	比较认同	一般	一般	一般	比较认同	一般	一般	一般	一般	比较认同	比较认同	一般	一般	一般	比较不认同	比较认同	一般	男	51~60岁	城镇	40年以上	一般	比较愿意	大学本科	机关单位	7-9万
96	118.78.145.217			2019-07-18 18:31:46	2019-07-18 18:33:53	Chrome 66.0.3359.126	Android Linux 5.1	2分7秒	正常完成	比较认同	一般	比较认同	比较认同	比较认同	认同	比较认同	认同	认同	认同	比较认同	比较认同	比较认同	认同	非常认同	认同	认同	一般	认同	比较认同	认同	比较认同	认同	认同	认同	男	41~50岁	城镇	21-30年	比较满意	愿意	硕士研究生及以上	事业单位	4-6万
97	218.26.55.186			2019-07-18 18:35:39	2019-07-18 18:37:23	Chrome 66.0.3359.126	Android Linux 8.1.0	1分44秒	正常完成	比较不认同	比较不认同	比较不认同	比较不认同	比较不认同	比较不认同	比较不认同	比较不认同	比较不认同	比较不认同	比较不认同	比较不认同	不认同	不认同	不认同	比较不认同	不认同	比较不认同	比较不认同	不认同	不认同	不认同	不认同	不认同	不认同	女	31~40岁	城镇	11-20年	不满意	不愿意	硕士研究生及以上	事业单位	7-9万
98	117.136.0.143			2019-07-18 18:39:32	2019-07-18 18:42:49	Unknown Browser	iPhone iOS 12.3.1	3分17秒	正常完成	一般	比较认同	比较不认同	比较不认同	一般	不认同	一般	比较不认同	比较认同	一般	比较不认同	一般	比较认同	一般	比较不认同	比较不认同	一般	比较认同	不认同	不认同	比较不认同	比较不认同	一般	一般	比较不认同	女	18岁-30岁	城镇	10年及以下	一般	比较愿意	硕士研究生及以上	企业单位	13万及以上
99	120.208.3.167			2019-07-18 18:48:16	2019-07-18 19:01:46	Chrome 66.0.3359.126	Android Linux 9	13分30秒	正常完成	比较不认同	不认同	不认同	不认同	不认同	非常不认同	非常不认同	不认同	非常不认同	不认同	不认同	不认同	不认同	不认同	不认同	非常不认同	比较不认同	不认同	不认同	不认同	不认同	比较不认同	一般	比较认同	比较不认同	男	51~60岁	城镇	21-30年	比较不满意	一般	大学专科	机关单位	7-9万
100	113.26.7.152			2019-07-18 18:59:58	2019-07-18 19:03:21	Chrome 66.0.3359.126	Android Linux 9	3分23秒	正常完成	非常不认同	不认同	非常不认同	认同	不认同	非常不认同	不认同	不认同	一般	不认同	不认同	一般	一般	非常不认同	一般	认同	不认同	不认同	一般	一般	一般	不认同	一般	一般	一般	男	31~40岁	城镇	11-20年	一般	愿意	硕士研究生及以上	机关单位	4-6万
101	117.136.87.44			2019-07-18 19:04:21	2019-07-18 19:17:23	Chrome 66.0.3359.126	Android Linux 8.1.0	13分2秒	正常完成	认同	比较认同	认同	比较认同	比较认同	比较认同	比较认同	比较认同	比较认同	认同	比较认同	比较认同	比较认同	比较认同	认同	认同	比较认同	比较认同	不认同	比较不认同	一般	一般	不认同	一般	不认同	女	41~50岁	农村	10年及以下	一般	愿意	初中	企业单位	4-6万
102	117.136.87.44			2019-07-18 19:21:14	2019-07-18 19:27:44	Chrome 66.0.3359.126	Android Linux 8.1.0	6分30秒	正常完成	一般	比较不认同	一般	一般	一般	比较不认同	一般	一般	不认同	一般	一般	不认同	一般	一般	一般	一般	一般	比较不认同	不认同	不认同	一般	一般	不认同	比较不认同	不认同	女	41~50岁	城镇	10年及以下	一般	比较愿意	初中	企业单位	4-6万
103	60.222.105.220			2019-07-18 19:33:49	2019-07-18 19:38:57	Unknown Browser	iPhone iOS 12.3.1	5分8秒	正常完成	比较认同	比较认同	一般	一般	比较认同	比较认同	一般	比较认同	一般	比较认同	一般	比较认同	比较认同	比较认同	认同	比较认同	比较认同	一般	一般	一般	比较认同	比较认同	比较认同	比较认同	认同	男	41~50岁	城镇	11-20年	一般	一般	大学本科	机关单位	4-6万
104	218.67.234.110			2019-07-18 20:13:16	2019-07-18 20:14:51	Unknown Browser	iPhone iOS 12.3.1	1分35秒	正常完成	不认同	非常不认同	比较不认同	比较不认同	不认同	比较不认同	非常不认同	非常不认同	不认同	比较不认同	非常不认同	非常不认同	不认同	比较不认同	一般	比较不认同	非常不认同	比较不认同	不认同	比较不认同	比较不认同	一般	非常不认同	非常不认同	非常不认同	男	18岁-30岁	城镇	21-30年	不满意	不愿意	硕士研究生及以上	事业单位	7-9万
105	117.179.126.138			2019-07-18 20:53:51	2019-07-18 20:57:10	Chrome 66.0.3359.126	Android Linux 8.0.0	3分19秒	正常完成	非常不认同	非常不认同	非常不认同	非常不认同	非常不认同	非常不认同	非常不认同	非常不认同	非常不认同	非常不认同	非常不认同	非常不认同	非常不认同	非常不认同	非常不认同	非常不认同	非常不认同	非常不认同	非常不认同	非常不认同	非常不认同	非常不认同	非常不认同	一般	非常不认同	男	31~40岁	城镇	10年及以下	非常不满意	一般	硕士研究生及以上	事业单位	13万及以上
106	218.26.55.31			2019-07-18 21:46:38	2019-07-18 21:50:41	Chrome 66.0.3359.126	Android Linux 5.0.2	4分3秒	正常完成	非常认同	认同	认同	认同	认同	认同	认同	认同	认同	认同	认同	非常认同	非常认同	非常认同	非常认同	非常认同	非常认同	认同	非常认同	认同	认同	认同	认同	认同	认同	男	60岁以上	城镇	31-40年	非常满意	愿意	高中/中专/技校	企业单位	4-6万
107	42.233.0.96			2019-07-18 22:01:21	2019-07-18 22:04:10	Unknown Browser	iPhone iOS 12.0	2分49秒	正常完成	非常不认同	非常不认同	非常不认同	非常不认同	不认同	不认同	不认同	不认同	不认同	不认同	非常不认同	非常不认同	非常不认同	非常不认同	一般	不认同	非常不认同	非常不认同	非常不认同	非常不认同	非常不认同	非常不认同	非常不认同	非常不认同	非常不认同	女	18岁-30岁	城镇	10年及以下	非常不满意	非常不愿意	大学本科	事业单位	7-9万
108	123.168.73.225			2019-07-18 23:04:19	2019-07-18 23:06:48	Chrome 66.0.3359.126	Android Linux 9	2分29秒	正常完成	比较认同	比较认同	比较认同	比较认同	认同	认同	比较认同	比较认同	比较认同	比较认同	比较认同	比较认同	比较认同	比较认同	比较认同	比较认同	比较认同	比较认同	一般	一般	比较认同	比较认同	认同	认同	非常认同	女	18岁-30岁	农村	10年及以下	比较满意	比较愿意	硕士研究生及以上	企业单位	4-6万
109	223.78.201.66			2019-07-18 23:07:13	2019-07-18 23:09:48	Chrome 66.0.3359.126	Android Linux 9	2分35秒	正常完成	比较不认同	比较不认同	一般	一般	一般	比较认同	比较不认同	比较认同	一般	一般	一般	一般	比较认同	一般	比较认同	比较认同	比较认同	一般	一般	认同	比较认同	比较认同	比较不认同	一般	一般	女	18岁-30岁	农村	21-30年	一般	一般	硕士研究生及以上	企业单位	10-12万
110	117.136.92.99			2019-07-19 08:34:03	2019-07-19 08:35:37	Chrome 66.0.3359.126	Android Linux 7.0	1分34秒	正常完成	比较认同	一般	比较认同	一般	比较认同	比较认同	认同	一般	比较认同	比较认同	比较认同	一般	一般	比较认同	一般	比较不认同	比较不认同	比较认同	一般	比较不认同	一般	一般	比较认同	比较认同	非常认同	女	18岁-30岁	城镇	10年及以下	一般	愿意	硕士研究生及以上	事业单位	13万及以上
111	60.222.98.206			2019-07-19 09:08:42	2019-07-19 09:15:19	Unknown Browser	iPhone iOS 12.3.1	6分37秒	正常完成	比较认同	一般	不认同	一般	比较认同	一般	非常不认同	一般	一般	比较不认同	一般	比较不认同	比较不认同	一般	比较不认同	不认同	比较不认同	不认同	不认同	不认同	不认同	不认同	不认同	一般	一般	女	41~50岁	城镇	21-30年	一般	不愿意	大学专科	自由个体	10-12万
112	223.104.14.22			2019-07-19 09:15:13	2019-07-19 09:17:23	Unknown Browser	iPhone iOS 12.1	2分10秒	正常完成	非常认同	非常认同	认同	认同	比较认同	认同	比较认同	比较认同	认同	认同	比较认同	认同	认同	认同	认同	比较认同	非常不认同	认同	一般	一般	比较认同	认同	一般	一般	一般	女	31~40岁	城镇	10年及以下	比较满意	比较不愿意	硕士研究生及以上	事业单位	7-9万
113	223.104.7.117			2019-07-19 16:10:06	2019-07-19 16:11:35	Unknown Browser	iPhone iOS 11.4.1	1分29秒	正常完成	比较认同	一般	认同	比较认同	比较认同	比较认同	认同	认同	认同	认同	认同	比较认同	一般	认同	认同	一般	比较不认同	一般	比较认同	比较不认同	认同	比较认同	一般	比较认同	认同	男	31~40岁	城镇	10年及以下	满意	愿意	硕士研究生及以上	事业单位	13万及以上
114	111.31.246.116			2019-07-19 16:09:39	2019-07-19 16:12:18	Unknown Browser	iPhone iOS 12.3.1	2分39秒	正常完成	比较认同	一般	比较认同	比较不认同	一般	认同	比较认同	一般	一般	一般	比较认同	一般	一般	一般	非常认同	认同	一般	一般	比较不认同	比较不认同	一般	一般	一般	非常认同	一般	男	31~40岁	城镇	10年及以下	一般	比较愿意	硕士研究生及以上	事业单位	13万及以上
115	106.47.248.40			2019-07-19 16:09:41	2019-07-19 16:12:41	Chrome 66.0.3359.126	Android Linux 9	3分0秒	正常完成	比较认同	认同	比较认同	比较认同	一般	一般	一般	比较认同	比较不认同	认同	一般	比较认同	一般	认同	认同	一般	比较认同	比较认同	比较不认同	比较不认同	比较不认同	一般	比较不认同	一般	比较认同	男	18岁-30岁	农村	10年及以下	一般	比较愿意	大学本科	事业单位	3万及以下
116	117.136.54.51			2019-07-19 16:13:23	2019-07-19 16:18:15	Chrome 66.0.3359.126	Android Linux 9	4分52秒	正常完成	不认同	比较不认同	不认同	不认同	不认同	不认同	比较不认同	比较不认同	不认同	非常不认同	不认同	不认同	非常不认同	不认同	不认同	不认同	比较不认同	不认同	不认同	非常不认同	非常不认同	比较不认同	非常不认同	比较不认同	非常不认同	男	31~40岁	城镇	11-20年	不满意	不愿意	硕士研究生及以上	事业单位	13万及以上
117	202.113.11.19			2019-07-19 16:09:11	2019-07-19 16:21:03	Chrome 39.0.2171.95	Windows Wechat	11分52秒	正常完成	一般	一般	比较不认同	比较认同	一般	比较认同	比较认同	一般	比较不认同	不认同	比较不认同	比较不认同	一般	比较认同	比较认同	比较认同	比较认同	一般	一般	比较不认同	一般	一般	不认同	比较认同	比较不认同	男	31~40岁	城镇	10年及以下	一般	比较愿意	大学本科	事业单位	4-6万
118	211.94.232.132			2019-07-19 16:18:47	2019-07-19 16:21:29	Chrome 66.0.3359.126	Android Linux 8.1.0	2分42秒	正常完成	比较不认同	比较不认同	一般	不认同	不认同	不认同	比较不认同	不认同	一般	一般	比较不认同	不认同	不认同	比较不认同	不认同	不认同	不认同	比较不认同	不认同	比较不认同	不认同	不认同	非常不认同	比较认同	比较不认同	男	18岁-30岁	城镇	10年及以下	比较不满意	比较愿意	硕士研究生及以上	事业单位	4-6万
119	103.3.96.51			2019-07-19 16:20:26	2019-07-19 16:23:14	Chrome 66.0.3359.126	Android Linux 8.1.0	2分48秒	正常完成	比较认同	比较认同	比较认同	比较认同	比较认同	比较认同	比较认同	一般	一般	一般	比较认同	比较认同	比较认同	比较认同	比较认同	比较认同	比较认同	认同	认同	比较认同	比较认同	比较认同	比较认同	认同	认同	男	18岁-30岁	城镇	10年及以下	比较满意	比较愿意	大学本科	自由个体	10-12万
120	112.231.57.18			2019-07-19 16:24:33	2019-07-19 16:26:56	Chrome 39.0.2171.95	Windows Wechat	2分23秒	正常完成	比较不认同	比较不认同	不认同	不认同	不认同	比较不认同	不认同	不认同	比较不认同	不认同	不认同	比较不认同	一般	一般	一般	比较不认同	比较不认同	不认同	不认同	不认同	一般	一般	比较不认同	比较认同	一般	男	18岁-30岁	城镇	10年及以下	不满意	比较愿意	硕士研究生及以上	事业单位	4-6万
121	106.47.249.55			2019-07-19 16:29:41	2019-07-19 16:31:41	Unknown Browser	iPhone iOS 12.3	2分0秒	正常完成	比较认同	比较认同	一般	一般	认同	非常认同	认同	认同	非常认同	比较认同	比较认同	比较认同	一般	比较认同	比较认同	一般	一般	认同	比较认同	一般	比较认同	认同	一般	一般	认同	女	18岁-30岁	城镇	10年及以下	比较满意	愿意	硕士研究生及以上	无业其他	3万及以下
122	202.113.176.29			2019-07-19 16:26:25	2019-07-19 16:32:06	Chrome 39.0.2171.95	Windows Wechat	5分41秒	正常完成	比较认同	认同	比较认同	一般	比较认同	一般	认同	一般	比较认同	认同	比较不认同	比较不认同	一般	比较不认同	比较认同	认同	一般	比较认同	不认同	不认同	比较认同	比较认同	比较不认同	不认同	不认同	女	18岁-30岁	城镇	10年及以下	比较满意	非常愿意	硕士研究生及以上	事业单位	10-12万
123	103.37.140.21			2019-07-19 16:27:52	2019-07-19 16:34:03	Chrome 39.0.2171.95	MacOS Macintosh X 10.13.6	6分11秒	正常完成	一般	比较不认同	一般	比较不认同	比较不认同	比较认同	比较不认同	一般	一般	不认同	比较不认同	比较认同	比较认同	比较不认同	比较不认同	一般	不认同	一般	不认同	不认同	一般	比较认同	不认同	一般	一般	女	18岁-30岁	城镇	21-30年	一般	比较愿意	硕士研究生及以上	无业其他	3万及以下
124	202.113.13.155			2019-07-19 16:32:35	2019-07-19 16:35:22	Chrome 39.0.2171.95	Windows Wechat QBCore/3.43.884.400 QQBrowser/9.0.2524.400	2分47秒	正常完成	一般	一般	比较不认同	一般	一般	不认同	一般	比较认同	不认同	不认同	比较不认同	比较不认同	比较认同	一般	一般	不认同	不认同	不认同	不认同	不认同	一般	一般	不认同	比较认同	非常不认同	男	18岁-30岁	城镇	10年及以下	比较满意	一般	硕士研究生及以上	自由个体	3万及以下
125	106.19.208.139			2019-07-19 16:38:28	2019-07-19 16:41:07	Chrome 39.0.2171.95	Windows Wechat	2分39秒	正常完成	比较认同	比较认同	认同	认同	认同	一般	比较认同	一般	比较认同	认同	一般	比较认同	一般	比较认同	认同	比较认同	认同	比较认同	比较不认同	比较不认同	一般	比较认同	认同	比较认同	比较认同	男	18岁-30岁	城镇	10年及以下	满意	比较愿意	硕士研究生及以上	无业其他	3万及以下
126	60.25.48.242			2019-07-19 16:41:53	2019-07-19 16:45:30	Chrome 66.0.3359.126	Android Linux 7.0	3分37秒	正常完成	认同	认同	认同	比较认同	比较认同	比较认同	一般	比较认同	一般	比较认同	比较认同	比较认同	一般	比较认同	比较认同	比较认同	比较认同	比较认同	比较认同	比较认同	比较认同	认同	认同	认同	一般	男	18岁-30岁	城镇	10年及以下	满意	愿意	硕士研究生及以上	企业单位	13万及以上
127	117.15.163.72			2019-07-19 16:48:05	2019-07-19 16:52:57	Chrome 66.0.3359.126	Android Linux 9	4分52秒	正常完成	一般	比较不认同	比较不认同	比较不认同	比较认同	比较认同	比较认同	比较认同	比较认同	比较认同	一般	不认同	一般	比较不认同	不认同	比较认同	比较不认同	比较认同	不认同	不认同	比较不认同	一般	不认同	一般	比较认同	女	31~40岁	城镇	10年及以下	比较不满意	比较愿意	硕士研究生及以上	事业单位	7-9万
128	113.129.67.112			2019-07-19 16:54:02	2019-07-19 16:55:35	Unknown Browser	iPhone iOS 12.3.1	1分33秒	正常完成	比较不认同	不认同	比较不认同	比较不认同	一般	比较认同	一般	比较不认同	一般	一般	一般	一般	比较不认同	比较不认同	比较不认同	比较不认同	一般	不认同	一般	不认同	比较不认同	不认同	不认同	比较不认同	比较不认同	男	31~40岁	城镇	10年及以下	比较不满意	一般	硕士研究生及以上	事业单位	13万及以上
129	221.239.127.18			2019-07-19 16:50:56	2019-07-19 16:56:07	Chrome 66.0.3359.126	Android Linux 9	5分11秒	正常完成	一般	比较不认同	比较不认同	不认同	一般	比较不认同	不认同	不认同	非常不认同	比较不认同	不认同	一般	比较不认同	比较不认同	一般	不认同	比较不认同	一般	比较不认同	比较不认同	不认同	比较不认同	不认同	一般	比较认同	男	18岁-30岁	城镇	10年及以下	不满意	比较愿意	硕士研究生及以上	企业单位	10-12万
130	221.207.42.156			2019-07-19 17:10:56	2019-07-19 17:13:20	Chrome 39.0.2171.95	Windows Wechat	2分24秒	正常完成	比较认同	比较认同	比较认同	比较认同	比较认同	比较认同	比较认同	认同	认同	一般	一般	一般	一般	一般	一般	一般	一般	一般	一般	一般	一般	一般	一般	一般	一般	男	18岁-30岁	农村	10年及以下	比较满意	比较愿意	硕士研究生及以上	事业单位	13万及以上
131	211.94.225.45			2019-07-19 16:47:32	2019-07-19 17:19:47	Unknown Browser	iPhone iOS 11.2.1	32分15秒	正常完成	一般	比较认同	认同	比较认同	一般	一般	认同	比较认同	比较认同	一般	比较认同	比较认同	比较认同	认同	认同	认同	比较认同	认同	一般	一般	比较认同	比较认同	认同	非常认同	认同	女	18岁-30岁	城镇	10年及以下	比较满意	愿意	硕士研究生及以上	事业单位	13万及以上
132	117.12.85.59			2019-07-19 18:14:34	2019-07-19 18:20:49	Unknown Browser	iPhone iOS 12.3.1	6分15秒	正常完成	比较认同	认同	认同	认同	认同	比较认同	一般	非常认同	认同	认同	认同	非常认同	认同	认同	认同	非常认同	认同	认同	一般	一般	非常认同	认同	认同	认同	非常认同	男	18岁-30岁	农村	11-20年	非常满意	非常愿意	大学本科	自由个体	4-6万
133	117.136.55.100			2019-07-19 18:24:57	2019-07-19 18:32:29	Unknown Browser	iPhone iOS 12.3.1	7分32秒	正常完成	比较认同	认同	比较认同	比较认同	一般	比较认同	比较认同	比较认同	比较认同	认同	比较认同	认同	认同	比较认同	比较认同	认同	比较认同	认同	比较不认同	比较认同	比较认同	比较认同	比较不认同	比较认同	比较认同	女	31~40岁	城镇	10年及以下	比较满意	愿意	硕士研究生及以上	事业单位	13万及以上
134	101.249.26.147			2019-07-19 19:17:00	2019-07-19 19:21:41	Chrome 66.0.3359.126	Android Linux 9	4分41秒	正常完成	比较认同	一般	一般	一般	一般	一般	比较认同	一般	一般	一般	一般	一般	一般	一般	一般	一般	一般	一般	一般	一般	一般	一般	一般	认同	比较认同	男	41~50岁	城镇	21-30年	一般	一般	硕士研究生及以上	事业单位	7-9万
135	112.45.97.171			2019-07-19 19:32:17	2019-07-19 19:34:50	Unknown Browser	iPhone iOS 12.3.1	2分33秒	正常完成	比较不认同	比较不认同	比较不认同	比较不认同	比较不认同	不认同	不认同	比较认同	比较认同	一般	一般	一般	比较不认同	比较不认同	比较认同	一般	一般	比较认同	比较不认同	比较不认同	比较认同	一般	不认同	不认同	不认同	女	18岁-30岁	农村	10年及以下	一般	愿意	硕士研究生及以上	企业单位	13万及以上
136	112.18.134.207			2019-07-19 19:33:45	2019-07-19 19:35:08	Chrome 66.0.3359.126	Android Linux 9	1分23秒	正常完成	比较认同	比较认同	比较认同	比较认同	认同	认同	认同	认同	认同	认同	认同	认同	比较认同	认同	非常认同	认同	非常认同	比较认同	认同	认同	认同	认同	比较认同	认同	认同	男	18岁-30岁	农村	21-30年	满意	愿意	硕士研究生及以上	机关单位	10-12万
137	171.216.235.204			2019-07-19 19:34:25	2019-07-19 19:35:48	Chrome 66.0.3359.126	Android Linux 8.1.0	1分23秒	正常完成	一般	一般	一般	一般	一般	一般	一般	比较认同	比较认同	认同	认同	认同	一般	非常认同	认同	比较认同	一般	比较不认同	认同	比较认同	比较不认同	非常认同	不认同	认同	比较不认同	男	41~50岁	农村	31-40年	非常满意	非常不愿意	小学及以下	务农	3万及以下
138	111.163.236.212			2019-07-19 19:45:13	2019-07-19 19:48:33	Chrome 66.0.3359.126	Android Linux 9	3分20秒	正常完成	比较不认同	不认同	一般	不认同	比较不认同	一般	不认同	比较不认同	比较不认同	比较不认同	不认同	不认同	不认同	一般	一般	比较不认同	不认同	不认同	不认同	不认同	不认同	比较不认同	不认同	不认同	一般	男	41~50岁	城镇	11-20年	比较不满意	一般	硕士研究生及以上	事业单位	13万及以上
139	58.243.254.251			2019-07-19 19:48:47	2019-07-19 19:52:58	Chrome 66.0.3359.126	Android Linux 9	4分11秒	正常完成	比较认同	比较认同	一般	一般	一般	比较认同	一般	比较不认同	一般	比较不认同	比较认同	认同	比较认同	一般	比较认同	一般	认同	认同	不认同	比较不认同	一般	比较认同	比较认同	认同	一般	男	18岁-30岁	农村	10年及以下	满意	一般	硕士研究生及以上	事业单位	10-12万
140	218.26.54.26			2019-07-19 19:49:13	2019-07-19 19:53:33	Chrome 66.0.3359.126	Android Linux 9	4分20秒	正常完成	比较不认同	一般	一般	比较认同	一般	一般	一般	一般	一般	一般	比较认同	一般	一般	一般	比较认同	一般	一般	一般	比较不认同	比较认同	一般	一般	比较认同	比较认同	比较认同	女	18岁-30岁	城镇	21-30年	一般	一般	大学本科	企业单位	10-12万
141	171.221.2.142			2019-07-19 19:52:38	2019-07-19 19:54:09	Unknown Browser	iPhone iOS 12.0	1分31秒	正常完成	不认同	不认同	比较不认同	一般	一般	比较不认同	不认同	一般	一般	比较不认同	不认同	一般	一般	一般	比较不认同	不认同	比较不认同	一般	不认同	不认同	一般	一般	一般	不认同	不认同	女	18岁-30岁	农村	11-20年	一般	一般	硕士研究生及以上	机关单位	7-9万
142	180.89.13.166			2019-07-19 19:54:11	2019-07-19 19:56:25	Chrome 66.0.3359.126	Android Linux 8.1.0	2分14秒	正常完成	比较不认同	比较不认同	一般	比较不认同	不认同	比较不认同	比较不认同	比较不认同	比较认同	比较不认同	一般	一般	比较不认同	不认同	一般	比较不认同	比较不认同	比较不认同	一般	不认同	比较不认同	比较不认同	一般	认同	认同	女	18岁-30岁	城镇	21-30年	比较不满意	比较不愿意	硕士研究生及以上	事业单位	4-6万
143	117.136.55.129			2019-07-19 20:52:03	2019-07-19 20:56:34	Chrome 66.0.3359.126	Android Linux 9	4分31秒	正常完成	比较认同	比较不认同	比较不认同	比较认同	一般	认同	比较不认同	比较不认同	比较认同	比较不认同	比较认同	比较不认同	一般	比较不认同	比较不认同	比较不认同	比较不认同	比较不认同	比较不认同	比较认同	比较不认同	比较不认同	比较不认同	比较不认同	比较认同	女	18岁-30岁	城镇	11-20年	比较满意	比较愿意	硕士研究生及以上	机关单位	10-12万
144	117.136.54.29			2019-07-19 20:58:56	2019-07-19 21:06:40	Unknown Browser	iPhone iOS 11.3	7分44秒	正常完成	比较认同	比较认同	一般	比较不认同	比较不认同	比较不认同	比较不认同	比较不认同	比较不认同	比较不认同	比较不认同	比较不认同	比较不认同	比较不认同	比较不认同	一般	比较不认同	一般	一般	一般	一般	一般	一般	一般	一般	女	18岁-30岁	农村	21-30年	一般	比较愿意	硕士研究生及以上	事业单位	7-9万
145	60.24.142.48			2019-07-19 21:18:30	2019-07-19 21:23:06	Chrome 66.0.3359.126	Android Linux 9	4分36秒	正常完成	认同	比较认同	认同	比较认同	认同	比较认同	认同	认同	认同	认同	认同	认同	比较认同	认同	认同	认同	认同	认同	一般	比较不认同	认同	认同	比较认同	认同	一般	男	18岁-30岁	农村	10年及以下	满意	愿意	大学本科	自由个体	4-6万
146	202.113.13.139			2019-07-19 21:21:47	2019-07-19 21:25:24	Chrome 66.0.3359.126	Android Linux 9	3分37秒	正常完成	比较认同	认同	认同	比较认同	比较认同	认同	认同	认同	认同	认同	认同	认同	认同	认同	比较认同	比较认同	比较认同	认同	一般	一般	比较认同	比较认同	认同	认同	一般	男	18岁-30岁	城镇	10年及以下	一般	一般	硕士研究生及以上	事业单位	13万及以上
147	223.72.64.252			2019-07-19 21:23:24	2019-07-19 21:29:48	Chrome 66.0.3359.126	Android Linux 9	6分24秒	正常完成	不认同	不认同	不认同	不认同	不认同	不认同	不认同	比较不认同	不认同	不认同	不认同	不认同	不认同	不认同	一般	比较认同	不认同	不认同	比较不认同	不认同	不认同	不认同	非常不认同	不认同	不认同	男	18岁-30岁	城镇	10年及以下	不满意	一般	硕士研究生及以上	企业单位	13万及以上
148	111.58.213.141			2019-07-19 21:36:11	2019-07-19 21:39:51	Unknown Browser	iPhone iOS 12.1.2	3分40秒	正常完成	比较不认同	比较不认同	一般	比较不认同	比较不认同	比较不认同	一般	比较不认同	一般	一般	比较不认同	一般	一般	一般	一般	一般	一般	一般	不认同	比较认同	一般	一般	比较不认同	比较认同	一般	女	18岁-30岁	城镇	10年及以下	比较不满意	比较愿意	硕士研究生及以上	无业其他	3万及以下
149	36.106.96.138			2019-07-19 21:37:17	2019-07-19 21:40:34	Chrome 66.0.3359.126	Android Linux 8.1.0	3分17秒	正常完成	比较不认同	比较不认同	不认同	比较不认同	比较不认同	不认同	不认同	比较不认同	比较不认同	比较不认同	比较不认同	比较不认同	比较不认同	比较不认同	比较不认同	一般	比较不认同	比较不认同	不认同	不认同	比较不认同	比较不认同	比较不认同	比较认同	一般	女	31~40岁	城镇	10年及以下	比较不满意	一般	硕士研究生及以上	事业单位	10-12万
150	111.31.246.149			2019-07-19 21:33:56	2019-07-19 21:40:54	Opera	Android Linux 8.0.0	6分58秒	正常完成	比较认同	一般	认同	比较认同	不认同	比较不认同	比较不认同	不认同	一般	一般	一般	比较认同	一般	一般	比较认同	认同	一般	比较不认同	比较不认同	不认同	一般	比较认同	不认同	一般	比较认同	男	31~40岁	城镇	10年及以下	一般	比较愿意	硕士研究生及以上	事业单位	3万及以下
151	171.44.187.192			2019-07-19 21:33:04	2019-07-19 21:43:12	Chrome 39.0.2171.95	Windows Wechat	10分8秒	正常完成	不认同	不认同	不认同	一般	一般	一般	不认同	一般	一般	不认同	一般	一般	一般	一般	一般	比较认同	比较认同	一般	不认同	不认同	一般	一般	比较认同	比较认同	比较不认同	女	18岁-30岁	城镇	11-20年	一般	比较愿意	硕士研究生及以上	事业单位	4-6万
152	27.190.17.198			2019-07-19 21:34:19	2019-07-19 21:43:59	Chrome 66.0.3359.126	Android Linux 9	9分40秒	正常完成	比较不认同	一般	比较不认同	不认同	比较不认同	不认同	一般	一般	不认同	比较不认同	一般	不认同	不认同	一般	比较不认同	比较认同	一般	不认同	非常不认同	不认同	非常不认同	不认同	一般	认同	不认同	女	31~40岁	城镇	10年及以下	不满意	愿意	大学本科	事业单位	10-12万
153	183.197.86.103			2019-07-19 21:43:50	2019-07-19 21:48:54	Chrome 66.0.3359.126	Android Linux 9	5分4秒	正常完成	一般	一般	比较认同	比较认同	比较认同	一般	一般	比较不认同	一般	比较不认同	一般	比较不认同	比较不认同	一般	一般	一般	不认同	比较不认同	不认同	不认同	一般	一般	比较不认同	比较不认同	不认同	男	31~40岁	城镇	10年及以下	比较不满意	比较愿意	大学本科	企业单位	4-6万
154	117.136.47.113			2019-07-19 21:45:47	2019-07-19 21:48:54	Unknown Browser	iPhone iOS 12.3.1	3分7秒	正常完成	一般	比较不认同	比较不认同	比较不认同	一般	不认同	一般	比较不认同	比较不认同	一般	一般	不认同	一般	一般	一般	一般	比较不认同	比较不认同	非常认同	非常不认同	一般	一般	一般	比较不认同	一般	男	31~40岁	城镇	31-40年	非常不满意	非常不愿意	大学本科	事业单位	13万及以上
155	117.136.91.229			2019-07-19 21:52:31	2019-07-19 21:55:26	Chrome 67.0.3396.87	Android Linux 8.1.0	2分55秒	正常完成	比较不认同	比较不认同	认同	比较不认同	比较不认同	一般	比较不认同	比较不认同	比较不认同	不认同	比较不认同	一般	比较不认同	比较不认同	比较不认同	比较不认同	认同	认同	一般	认同	比较不认同	比较不认同	不认同	比较认同	比较认同	男	18岁-30岁	农村	10年及以下	一般	比较愿意	硕士研究生及以上	事业单位	4-6万
156	221.192.178.202			2019-07-19 21:59:31	2019-07-19 22:00:50	Chrome 66.0.3359.126	Android Linux 9	1分19秒	正常完成	非常认同	比较认同	比较认同	比较认同	一般	一般	一般	一般	认同	比较认同	一般	不认同	一般	一般	一般	一般	一般	一般	一般	一般	一般	一般	一般	一般	一般	男	31~40岁	城镇	10年及以下	不满意	比较不愿意	大学本科	社会团体	13万及以上
157	124.23.132.150			2019-07-19 22:01:33	2019-07-19 22:05:11	Chrome 66.0.3359.126	Android Linux 9	3分38秒	正常完成	不认同	比较不认同	不认同	比较不认同	不认同	不认同	不认同	不认同	比较不认同	不认同	不认同	比较不认同	比较不认同	不认同	不认同	不认同	不认同	不认同	不认同	不认同	比较不认同	不认同	不认同	比较不认同	一般	男	18岁-30岁	城镇	10年及以下	比较不满意	一般	大学本科	企业单位	7-9万
158	171.117.46.102			2019-07-19 22:23:22	2019-07-19 22:26:46	Unknown Browser	iPhone iOS 12.3.1	3分24秒	正常完成	一般	一般	一般	比较不认同	比较不认同	比较认同	比较认同	比较不认同	一般	一般	一般	一般	一般	比较认同	比较认同	一般	比较不认同	比较不认同	比较认同	比较认同	比较不认同	比较认同	一般	一般	比较认同	女	31~40岁	城镇	11-20年	一般	一般	硕士研究生及以上	事业单位	7-9万
159	117.136.54.44			2019-07-19 22:35:13	2019-07-19 22:39:02	Unknown Browser	iPhone iOS 12.3.1	3分49秒	正常完成	认同	比较认同	认同	比较认同	一般	比较认同	比较认同	一般	认同	比较认同	一般	认同	比较认同	比较认同	一般	比较认同	认同	比较认同	一般	一般	一般	比较认同	比较认同	一般	认同	男	31~40岁	城镇	10年及以下	比较满意	愿意	硕士研究生及以上	事业单位	7-9万
160	123.174.44.224			2019-07-19 23:11:01	2019-07-19 23:13:49	Chrome 66.0.3359.126	Android Linux 8.0.0	2分48秒	正常完成	一般	一般	一般	一般	一般	一般	一般	一般	一般	一般	一般	比较认同	比较认同	一般	一般	一般	一般	比较认同	一般	一般	一般	一般	一般	一般	比较认同	女	18岁-30岁	城镇	11-20年	比较满意	比较愿意	硕士研究生及以上	无业其他	3万及以下
161	117.136.54.46			2019-07-19 23:39:17	2019-07-19 23:43:43	Opera	Android Linux 8.0.0	4分26秒	正常完成	比较认同	比较认同	一般	比较认同	比较不认同	比较不认同	一般	比较不认同	一般	一般	一般	比较不认同	一般	一般	比较认同	比较认同	比较不认同	比较不认同	比较不认同	比较不认同	比较认同	比较认同	认同	比较认同	比较认同	女	31~40岁	城镇	11-20年	比较满意	比较愿意	硕士研究生及以上	事业单位	10-12万
162	120.192.36.153			2019-07-20 08:29:24	2019-07-20 08:34:17	Unknown Browser	iPhone iOS 10.3.1	4分53秒	正常完成	比较认同	一般	一般	比较不认同	比较不认同	比较不认同	一般	一般	比较不认同	比较不认同	比较不认同	一般	一般	一般	比较不认同	比较不认同	比较不认同	一般	不认同	不认同	比较不认同	比较不认同	比较不认同	比较认同	不认同	女	31~40岁	农村	21-30年	比较不满意	比较愿意	高中/中专/技校	自由个体	4-6万
163	124.64.17.83			2019-07-20 10:11:08	2019-07-20 10:13:45	Unknown Browser	iPhone iOS 12.3.1	2分37秒	正常完成	一般	一般	一般	一般	一般	一般	一般	一般	一般	一般	一般	一般	一般	一般	一般	一般	一般	一般	一般	一般	一般	一般	一般	一般	认同	女	18岁-30岁	城镇	11-20年	一般	一般	硕士研究生及以上	企业单位	13万及以上
164	112.224.75.92			2019-07-20 10:11:27	2019-07-20 10:14:42	Opera	Android Linux 8.0.0	3分15秒	正常完成	比较认同	比较认同	一般	比较认同	比较认同	一般	比较认同	比较认同	比较认同	比较认同	比较认同	比较认同	比较认同	比较认同	比较认同	比较认同	比较认同	一般	一般	一般	比较认同	比较认同	一般	比较认同	一般	男	18岁-30岁	城镇	21-30年	一般	一般	硕士研究生及以上	机关单位	13万及以上
165	106.117.106.1			2019-07-20 10:13:15	2019-07-20 10:16:23	Chrome 66.0.3359.126	Android Linux 9	3分8秒	正常完成	比较认同	比较认同	一般	认同	比较认同	比较认同	一般	一般	一般	一般	一般	一般	比较认同	一般	认同	认同	认同	比较不认同	不认同	不认同	一般	一般	不认同	不认同	比较认同	女	18岁-30岁	农村	21-30年	一般	愿意	大学本科	企业单位	7-9万
166	124.64.16.191			2019-07-20 10:12:39	2019-07-20 10:16:41	Unknown Browser	iPhone iOS 12.3.1	4分2秒	正常完成	比较认同	一般	比较认同	一般	比较认同	比较认同	认同	比较不认同	一般	比较认同	比较认同	比较认同	一般	比较不认同	比较不认同	一般	比较不认同	一般	一般	比较不认同	一般	一般	非常不认同	比较认同	非常认同	男	18岁-30岁	城镇	11-20年	比较满意	非常愿意	大学本科	企业单位	7-9万
167	221.192.180.227			2019-07-20 10:16:34	2019-07-20 10:19:05	Unknown Browser	iPhone iOS 11.3	2分31秒	正常完成	一般	一般	一般	一般	一般	一般	一般	比较认同	比较认同	一般	一般	比较认同	比较认同	比较认同	比较认同	非常认同	非常认同	非常认同	比较认同	非常认同	比较认同	比较认同	认同	认同	比较认同	女	18岁-30岁	城镇	10年及以下	比较满意	比较愿意	大学本科	企业单位	13万及以上
168	112.17.236.104			2019-07-20 10:20:31	2019-07-20 10:23:31	Unknown Browser	iPhone iOS 12.2	3分0秒	正常完成	比较认同	比较认同	比较认同	比较认同	比较认同	认同	比较认同	认同	比较认同	一般	一般	比较认同	一般	比较认同	一般	比较认同	一般	一般	比较认同	比较认同	比较认同	比较认同	比较认同	比较认同	比较认同	男	18岁-30岁	城镇	10年及以下	比较满意	比较愿意	硕士研究生及以上	企业单位	7-9万
169	117.136.38.165			2019-07-20 10:12:13	2019-07-20 10:28:55	Unknown Browser	iPhone iOS 12.3.2	16分42秒	正常完成	比较不认同	不认同	一般	一般	不认同	比较不认同	一般	不认同	一般	一般	一般	一般	不认同	比较不认同	比较不认同	一般	一般	一般	不认同	不认同	比较不认同	不认同	不认同	认同	一般	男	31~40岁	农村	21-30年	比较不满意	比较愿意	高中/中专/技校	务农	4-6万
170	119.182.0.122			2019-07-20 10:30:27	2019-07-20 10:33:54	Chrome 66.0.3359.126	Android Linux 9	3分27秒	正常完成	比较认同	比较认同	一般	一般	一般	一般	一般	比较认同	一般	一般	一般	一般	一般	一般	一般	一般	一般	一般	比较不认同	不认同	比较不认同	比较不认同	不认同	认同	一般	男	18岁-30岁	农村	11-20年	一般	比较不愿意	硕士研究生及以上	企业单位	13万及以上
171	101.31.69.25			2019-07-20 10:34:44	2019-07-20 10:36:48	Unknown Browser	iPhone iOS 12.3.1	2分4秒	正常完成	认同	比较认同	认同	比较认同	一般	比较认同	比较认同	一般	比较认同	非常不认同	比较认同	比较认同	比较认同	一般	一般	比较认同	比较认同	一般	比较认同	比较认同	比较认同	一般	一般	一般	一般	男	31~40岁	城镇	10年及以下	一般	一般	硕士研究生及以上	企业单位	3万及以下
172	117.136.38.144			2019-07-20 10:49:15	2019-07-20 10:50:57	Chrome 67.0.3396.87	Android Linux 8.1.0	1分42秒	正常完成	认同	认同	认同	一般	一般	认同	认同	比较认同	比较认同	认同	一般	认同	比较认同	认同	比较认同	比较认同	认同	一般	认同	一般	认同	一般	认同	比较认同	认同	女	18岁-30岁	城镇	10年及以下	满意	愿意	硕士研究生及以上	事业单位	10-12万
173	223.104.4.112			2019-07-20 11:02:41	2019-07-20 11:08:07	Chrome 66.0.3359.126	Android Linux 9	5分26秒	正常完成	认同	比较认同	比较认同	一般	比较认同	比较认同	比较认同	一般	一般	比较认同	比较认同	比较认同	认同	比较认同	比较认同	认同	比较认同	比较认同	比较认同	一般	比较认同	认同	一般	比较认同	比较认同	男	18岁-30岁	城镇	10年及以下	比较满意	比较愿意	硕士研究生及以上	企业单位	13万及以上
174	124.64.16.142			2019-07-20 11:15:00	2019-07-20 11:17:01	Unknown Browser	iPhone iOS 12.3.1	2分1秒	正常完成	一般	比较认同	比较认同	一般	比较认同	一般	比较不认同	一般	一般	一般	一般	一般	一般	一般	比较认同	比较认同	一般	一般	比较不认同	比较不认同	比较不认同	一般	比较不认同	比较认同	比较不认同	女	18岁-30岁	城镇	10年及以下	一般	比较愿意	硕士研究生及以上	事业单位	10-12万
175	223.104.101.184			2019-07-20 11:36:41	2019-07-20 11:42:24	Chrome 66.0.3359.126	Android Linux 7.1.2	5分43秒	正常完成	比较认同	比较不认同	比较不认同	比较认同	比较认同	比较认同	不认同	一般	比较不认同	比较不认同	比较不认同	不认同	不认同	不认同	不认同	比较不认同	不认同	不认同	不认同	不认同	不认同	比较不认同	不认同	不认同	比较认同	女	18岁-30岁	农村	11-20年	比较满意	愿意	大学本科	企业单位	7-9万
176	119.162.34.199			2019-07-20 11:50:05	2019-07-20 11:51:32	Unknown Browser	iPhone iOS 12.3.2	1分27秒	正常完成	比较认同	比较认同	比较认同	比较认同	比较认同	比较认同	一般	比较不认同	比较认同	比较认同	比较认同	一般	非常不认同	认同	认同	比较不认同	非常认同	比较认同	认同	认同	比较认同	比较不认同	比较不认同	比较不认同	比较认同	男	18岁-30岁	城镇	10年及以下	满意	愿意	硕士研究生及以上	机关单位	3万及以下
177	219.143.128.123			2019-07-20 11:54:15	2019-07-20 12:02:24	Unknown Browser	iPhone iOS 12.3.1	8分9秒	正常完成	比较不认同	比较不认同	一般	一般	一般	比较不认同	一般	比较不认同	一般	一般	一般	一般	一般	认同	比较不认同	比较认同	比较不认同	比较不认同	比较不认同	比较认同	一般	比较不认同	不认同	比较认同	比较不认同	女	18岁-30岁	城镇	21-30年	一般	愿意	硕士研究生及以上	事业单位	10-12万
178	36.106.156.250			2019-07-20 11:59:59	2019-07-20 12:06:50	Unknown Browser	iPhone iOS 10.3.3	6分51秒	正常完成	比较不认同	比较不认同	比较不认同	不认同	比较不认同	不认同	不认同	一般	一般	不认同	不认同	一般	一般	比较不认同	不认同	一般	比较不认同	不认同	不认同	比较不认同	比较不认同	一般	比较不认同	比较认同	认同	女	18岁-30岁	城镇	10年及以下	一般	比较愿意	硕士研究生及以上	无业其他	3万及以下
179	153.118.122.48			2019-07-20 11:59:12	2019-07-20 12:08:40	Chrome 72.0.3626.121	Android Linux 9	9分28秒	正常完成	一般	比较不认同	比较不认同	一般	比较认同	比较不认同	一般	一般	一般	比较不认同	一般	比较认同	一般	一般	一般	比较认同	比较认同	一般	不认同	不认同	比较不认同	一般	非常不认同	比较认同	非常认同	男	18岁-30岁	城镇	21-30年	比较满意	非常愿意	硕士研究生及以上	事业单位	4-6万
180	202.113.13.147			2019-07-20 12:15:19	2019-07-20 12:18:53	Chrome 39.0.2171.95	Windows Wechat	3分34秒	正常完成	一般	一般	比较不认同	比较不认同	一般	比较认同	一般	一般	一般	比较不认同	比较不认同	一般	一般	比较认同	比较认同	一般	不认同	不认同	一般	比较认同	不认同	比较不认同	非常不认同	非常认同	比较不认同	男	31~40岁	农村	11-20年	一般	不愿意	硕士研究生及以上	事业单位	4-6万
181	218.26.54.52			2019-07-20 12:22:24	2019-07-20 12:25:49	Unknown Browser	iPhone iOS 12.3.1	3分25秒	正常完成	一般	一般	一般	一般	比较认同	一般	比较认同	比较认同	一般	一般	一般	比较认同	比较认同	一般	比较不认同	一般	比较不认同	一般	比较不认同	比较认同	比较认同	比较认同	不认同	认同	比较认同	女	18岁-30岁	城镇	21-30年	比较满意	比较愿意	大学本科	事业单位	4-6万
182	123.174.126.69			2019-07-20 12:24:40	2019-07-20 12:29:22	Unknown Browser	iPhone iOS 12.3.1	4分42秒	正常完成	一般	比较不认同	非常不认同	一般	非常不认同	认同	非常不认同	比较不认同	一般	非常不认同	非常不认同	比较不认同	比较不认同	非常不认同	一般	不认同	比较不认同	一般	不认同	一般	一般	一般	认同	非常认同	非常不认同	男	18岁-30岁	农村	21-30年	一般	非常愿意	大学本科	自由个体	13万及以上
183	223.220.37.121			2019-07-20 12:31:09	2019-07-20 12:34:26	Chrome 66.0.3359.126	Android Linux 7.0	3分17秒	正常完成	一般	一般	一般	一般	比较不认同	一般	比较不认同	比较认同	一般	比较认同	比较不认同	一般	一般	比较认同	比较认同	一般	比较不认同	一般	不认同	不认同	一般	一般	比较认同	一般	比较不认同	男	31~40岁	城镇	11-20年	一般	比较愿意	硕士研究生及以上	企业单位	10-12万
184	221.197.132.193			2019-07-20 12:27:58	2019-07-20 12:35:47	Chrome 66.0.3359.126	Android Linux 9	7分49秒	正常完成	认同	认同	比较认同	比较认同	一般	一般	一般	比较不认同	一般	比较认同	比较不认同	比较认同	一般	比较认同	非常认同	非常认同	一般	一般	比较不认同	不认同	一般	比较认同	非常不认同	非常不认同	比较不认同	女	18岁-30岁	城镇	21-30年	一般	愿意	大学本科	企业单位	4-6万
185	183.202.186.236			2019-07-20 12:21:00	2019-07-20 12:38:19	Chrome 67.0.3396.87	Android Linux 8.0.0	17分19秒	正常完成	比较认同	比较认同	比较认同	比较认同	比较认同	比较认同	比较认同	比较认同	比较认同	比较认同	比较认同	比较认同	比较认同	比较认同	比较认同	比较认同	比较认同	比较认同	比较认同	一般	一般	一般	一般	认同	认同	男	31~40岁	城镇	21-30年	一般	比较愿意	大学本科	自由个体	3万及以下
186	221.207.37.39			2019-07-20 13:08:58	2019-07-20 13:12:20	Unknown Browser	iPhone iOS 12.3.1	3分22秒	正常完成	比较不认同	比较不认同	一般	不认同	不认同	比较不认同	不认同	一般	一般	一般	不认同	一般	一般	比较不认同	比较认同	比较认同	比较认同	一般	非常不认同	非常认同	一般	不认同	不认同	认同	一般	男	18岁-30岁	城镇	10年及以下	一般	一般	硕士研究生及以上	事业单位	10-12万
187	221.207.37.40			2019-07-20 13:56:42	2019-07-20 13:58:07	Unknown Browser	iPhone iOS 12.3.1	1分25秒	正常完成	比较认同	认同	比较认同	认同	认同	认同	比较认同	比较认同	比较不认同	比较认同	比较认同	比较认同	比较不认同	比较不认同	比较不认同	一般	比较认同	一般	一般	一般	一般	比较不认同	一般	一般	一般	男	31~40岁	城镇	10年及以下	满意	比较愿意	大学本科	事业单位	13万及以上
188	112.67.89.90			2019-07-20 12:35:02	2019-07-20 13:58:10	Unknown Browser	iPhone iOS 12.1.2	83分8秒	正常完成	比较认同	一般	一般	比较认同	一般	一般	一般	一般	一般	一般	一般	一般	比较不认同	一般	比较认同	一般	一般	比较不认同	非常不认同	非常不认同	一般	一般	一般	认同	一般	男	31~40岁	农村	11-20年	不满意	比较愿意	大学本科	务农	3万及以下
189	223.88.50.227			2019-07-20 14:31:19	2019-07-20 14:33:52	Chrome 66.0.3359.126	Android Linux 6.0.1	2分33秒	正常完成	比较认同	一般	认同	认同	认同	非常认同	一般	认同	比较认同	认同	非常认同	比较认同	比较认同	比较认同	比较认同	比较认同	一般	一般	一般	一般	比较认同	认同	一般	非常认同	认同	女	18岁-30岁	城镇	10年及以下	满意	愿意	硕士研究生及以上	无业其他	3万及以下
190	59.42.87.99			2019-07-20 14:30:54	2019-07-20 14:34:28	Unknown Browser	iPhone iOS 12.3.1	3分34秒	正常完成	认同	比较认同	比较认同	一般	一般	比较认同	比较不认同	一般	比较认同	认同	比较认同	认同	认同	比较认同	认同	比较认同	一般	一般	比较不认同	比较不认同	一般	比较认同	不认同	比较不认同	一般	女	18岁-30岁	农村	10年及以下	满意	愿意	硕士研究生及以上	无业其他	3万及以下
191	117.136.77.122			2019-07-20 14:44:40	2019-07-20 14:47:36	Unknown Browser	iPhone iOS 12.3.1	2分56秒	正常完成	比较认同	认同	比较不认同	一般	一般	比较认同	比较认同	一般	认同	比较认同	比较认同	认同	比较认同	认同	认同	认同	比较认同	认同	认同	比较认同	认同	认同	认同	比较认同	认同	男	18岁-30岁	农村	21-30年	一般	愿意	硕士研究生及以上	事业单位	10-12万
192	202.113.13.16			2019-07-20 14:46:18	2019-07-20 14:47:58	Chrome 39.0.2171.95	Windows Wechat	1分40秒	正常完成	比较不认同	一般	比较不认同	比较不认同	比较认同	比较认同	比较不认同	一般	比较认同	非常认同	非常认同	比较不认同	非常认同	非常不认同	非常不认同	比较认同	比较认同	非常不认同	比较认同	比较认同	非常认同	比较不认同	不认同	比较认同	比较不认同	男	18岁-30岁	农村	10年及以下	比较满意	非常愿意	硕士研究生及以上	无业其他	3万及以下
193	220.115.30.189			2019-07-20 15:07:36	2019-07-20 15:08:49	Unknown Browser	iPhone iOS 12.3.1	1分13秒	正常完成	比较认同	比较认同	比较不认同	比较不认同	比较认同	认同	一般	一般	比较不认同	比较认同	比较不认同	不认同	比较认同	比较认同	一般	比较不认同	比较不认同	比较认同	比较认同	认同	非常认同	比较认同	认同	比较不认同	一般	男	60岁以上	农村	40年以上	比较满意	愿意	初中	事业单位	4-6万
194	218.67.235.136			2019-07-20 15:04:14	2019-07-20 15:09:13	Chrome 66.0.3359.126	Android Linux 8.1.0	4分59秒	正常完成	不认同	不认同	不认同	不认同	不认同	不认同	不认同	不认同	不认同	不认同	不认同	不认同	不认同	不认同	不认同	不认同	不认同	不认同	不认同	不认同	不认同	不认同	不认同	不认同	不认同	男	18岁-30岁	城镇	10年及以下	不满意	愿意	硕士研究生及以上	机关单位	3万及以下
195	117.136.54.56			2019-07-20 15:05:16	2019-07-20 15:09:47	Chrome 67.0.3396.87	Android Linux 8.1.0	4分31秒	正常完成	一般	比较认同	一般	不认同	比较不认同	比较不认同	比较不认同	比较不认同	不认同	一般	比较不认同	一般	一般	比较认同	不认同	一般	不认同	不认同	不认同	不认同	一般	一般	不认同	一般	一般	男	18岁-30岁	城镇	10年及以下	一般	一般	硕士研究生及以上	自由个体	3万及以下
196	202.113.3.218			2019-07-20 15:06:14	2019-07-20 15:09:52	Chrome 67.0.3396.87	Android Linux 9	3分38秒	正常完成	一般	比较认同	比较认同	一般	比较认同	比较认同	一般	比较认同	一般	认同	认同	比较认同	比较认同	比较认同	比较认同	一般	一般	比较不认同	不认同	非常不认同	一般	比较认同	不认同	一般	比较不认同	男	18岁-30岁	城镇	10年及以下	一般	比较愿意	硕士研究生及以上	无业其他	3万及以下
197	221.192.179.231			2019-07-20 15:18:42	2019-07-20 15:19:49	Unknown Browser	iPhone iOS 12.3.1	1分7秒	正常完成	非常认同	非常认同	非常认同	非常认同	非常认同	非常认同	非常认同	非常认同	非常认同	非常认同	非常认同	非常认同	非常认同	非常认同	非常认同	非常认同	非常认同	非常认同	非常认同	非常认同	非常认同	非常认同	非常认同	非常认同	非常认同	男	18岁-30岁	农村	10年及以下	非常满意	非常愿意	大学本科	企业单位	13万及以上
198	114.94.40.139			2019-07-20 15:21:12	2019-07-20 15:22:10	Unknown Browser	iPhone iOS 12.3.2	0分58秒	正常完成	非常不认同	非常不认同	非常不认同	非常不认同	非常不认同	非常不认同	非常不认同	非常不认同	非常不认同	非常不认同	非常不认同	非常不认同	非常不认同	非常不认同	非常不认同	非常不认同	非常不认同	非常不认同	非常不认同	非常不认同	非常不认同	非常不认同	非常不认同	非常不认同	非常不认同	男	60岁以上	农村	21-30年	非常满意	非常愿意	初中	无业其他	13万及以上
199	182.144.179.46			2019-07-20 15:25:40	2019-07-20 15:28:27	Chrome 66.0.3359.126	Android Linux 9	2分47秒	正常完成	非常认同	非常认同	非常认同	非常认同	非常认同	非常认同	非常认同	非常认同	非常认同	非常认同	非常认同	非常认同	非常认同	非常认同	非常认同	非常认同	非常认同	非常认同	非常认同	非常认同	非常认同	非常认同	非常认同	非常认同	非常认同	女	41~50岁	城镇	40年以上	非常满意	非常愿意	大学本科	事业单位	13万及以上
200	202.113.3.218			2019-07-20 15:26:15	2019-07-20 15:28:33	Chrome 39.0.2171.95	Windows Wechat	2分18秒	正常完成	一般	一般	比较认同	比较认同	比较认同	一般	非常认同	认同	比较认同	比较认同	比较认同	比较认同	认同	非常认同	非常认同	一般	认同	一般	比较认同	比较认同	非常认同	比较不认同	比较认同	比较认同	一般	男	18岁-30岁	城镇	11-20年	比较满意	比较愿意	高中/中专/技校	务农	3万及以下
201	117.136.79.91			2019-07-20 15:28:29	2019-07-20 15:29:47	Unknown Browser	iPhone iOS 11.0	1分18秒	正常完成	非常认同	非常认同	非常认同	非常认同	非常认同	非常认同	非常认同	非常认同	非常认同	非常认同	非常认同	非常认同	非常认同	非常认同	非常认同	非常认同	非常认同	非常认同	非常认同	非常认同	非常认同	非常认同	非常认同	非常认同	非常认同	男	18岁-30岁	城镇	10年及以下	非常满意	非常愿意	大学本科	机关单位	7-9万
202	220.115.30.189			2019-07-20 15:31:11	2019-07-20 15:32:00	Unknown Browser	iPhone iOS 12.3.1	0分49秒	正常完成	认同	比较认同	非常认同	比较不认同	认同	比较认同	一般	认同	比较认同	一般	认同	比较不认同	认同	比较认同	一般	比较认同	比较不认同	比较认同	一般	认同	一般	认同	比较不认同	比较认同	比较不认同	男	41~50岁	农村	40年以上	比较不满意	愿意	初中	务农	7-9万
203	120.208.3.167			2019-07-20 15:30:39	2019-07-20 15:33:58	Chrome 66.0.3359.126	Android Linux 5.0.2	3分19秒	正常完成	一般	比较不认同	一般	比较认同	一般	比较不认同	比较不认同	一般	一般	一般	一般	一般	一般	比较认同	比较认同	不认同	不认同	比较不认同	比较不认同	一般	一般	一般	比较认同	认同	不认同	女	18岁-30岁	城镇	11-20年	一般	比较不愿意	大学专科	无业其他	3万及以下
204	117.14.201.31			2019-07-20 15:30:54	2019-07-20 15:34:04	Unknown Browser	iPhone iOS 12.2	3分10秒	正常完成	一般	一般	比较不认同	比较不认同	比较不认同	比较不认同	比较不认同	不认同	不认同	比较认同	认同	一般	比较不认同	不认同	比较不认同	不认同	比较不认同	非常不认同	非常不认同	非常不认同	比较不认同	比较认同	一般	比较认同	比较不认同	女	18岁-30岁	城镇	10年及以下	比较满意	不愿意	硕士研究生及以上	事业单位	13万及以上
205	202.113.3.218			2019-07-20 15:34:14	2019-07-20 15:35:27	Chrome 39.0.2171.95	Windows Wechat	1分13秒	正常完成	比较认同	比较认同	一般	一般	不认同	比较不认同	不认同	比较认同	比较认同	一般	比较不认同	一般	比较认同	比较不认同	一般	比较不认同	比较不认同	比较不认同	一般	比较认同	比较不认同	比较不认同	一般	一般	比较认同	女	31~40岁	城镇	11-20年	一般	一般	大学专科	企业单位	3万及以下
206	220.115.30.189			2019-07-20 15:38:02	2019-07-20 15:38:50	Unknown Browser	iPhone iOS 12.3.1	0分48秒	正常完成	认同	比较不认同	比较认同	一般	一般	比较认同	比较认同	比较认同	一般	不认同	一般	比较不认同	一般	比较认同	比较认同	比较不认同	比较认同	比较不认同	比较认同	比较不认同	比较认同	比较不认同	认同	比较不认同	比较不认同	女	60岁以上	农村	40年以上	比较不满意	非常愿意	初中	务农	3万及以下
207	202.113.3.218			2019-07-20 15:38:00	2019-07-20 15:38:56	Chrome 39.0.2171.95	Windows Wechat	0分56秒	正常完成	不认同	不认同	比较不认同	一般	比较认同	比较不认同	不认同	不认同	一般	认同	比较认同	比较认同	一般	不认同	不认同	比较认同	一般	比较认同	一般	一般	比较认同	比较不认同	比较不认同	比较不认同	一般	男	41~50岁	农村	31-40年	一般	比较愿意	初中	务农	3万及以下
208	202.113.3.218			2019-07-20 15:39:00	2019-07-20 15:40:03	Chrome 39.0.2171.95	Windows Wechat	1分3秒	正常完成	一般	不认同	不认同	一般	一般	比较认同	比较认同	比较认同	一般	一般	比较不认同	比较不认同	比较认同	一般	比较认同	一般	比较认同	一般	比较不认同	比较不认同	比较不认同	一般	比较认同	一般	比较不认同	男	51~60岁	农村	40年以上	一般	一般	初中	务农	3万及以下
209	183.199.81.25			2019-07-20 15:36:43	2019-07-20 15:40:14	Unknown Browser	iPhone iOS 12.3.1	3分31秒	正常完成	比较不认同	一般	一般	比较不认同	一般	一般	一般	一般	一般	一般	一般	一般	一般	一般	比较不认同	比较认同	一般	一般	不认同	比较不认同	不认同	比较不认同	非常不认同	不认同	比较不认同	女	18岁-30岁	城镇	11-20年	一般	比较愿意	大学本科	无业其他	3万及以下
210	202.113.3.218			2019-07-20 15:40:06	2019-07-20 15:41:10	Chrome 39.0.2171.95	Windows Wechat	1分4秒	正常完成	比较不认同	比较不认同	比较不认同	比较不认同	一般	比较认同	一般	比较认同	比较认同	比较认同	一般	比较认同	一般	一般	比较不认同	比较认同	比较不认同	比较不认同	比较不认同	比较认同	比较认同	比较认同	比较认同	一般	比较不认同	女	60岁以上	农村	40年以上	比较满意	比较愿意	初中	务农	3万及以下
211	202.113.3.218			2019-07-20 15:41:23	2019-07-20 15:42:31	Chrome 39.0.2171.95	Windows Wechat	1分8秒	正常完成	一般	非常不认同	非常不认同	比较不认同	非常不认同	一般	比较认同	比较不认同	比较不认同	比较不认同	比较认同	比较认同	比较认同	比较认同	一般	一般	比较认同	比较不认同	比较不认同	比较不认同	比较认同	一般	一般	一般	非常认同	男	60岁以上	农村	40年以上	比较满意	比较愿意	初中	务农	3万及以下
212	211.94.242.57			2019-07-20 15:42:47	2019-07-20 15:43:35	Unknown Browser	iPhone iOS 12.3.1	0分48秒	正常完成	比较认同	比较认同	一般	比较不认同	一般	一般	比较认同	一般	比较不认同	不认同	不认同	不认同	比较认同	比较认同	认同	比较认同	比较认同	比较认同	一般	一般	比较认同	比较不认同	一般	比较认同	比较认同	男	60岁以上	农村	40年以上	比较满意	愿意	初中	务农	3万及以下
213	211.94.242.57			2019-07-20 15:43:40	2019-07-20 15:44:35	Unknown Browser	iPhone iOS 12.3.1	0分55秒	正常完成	比较认同	认同	比较认同	一般	一般	一般	比较认同	一般	认同	非常认同	非常认同	非常认同	比较认同	认同	比较认同	比较不认同	一般	一般	非常认同	比较认同	非常认同	认同	非常认同	认同	非常认同	女	60岁以上	农村	40年以上	比较满意	愿意	初中	务农	4-6万
214	211.94.242.57			2019-07-20 15:44:38	2019-07-20 15:45:36	Unknown Browser	iPhone iOS 12.3.1	0分58秒	正常完成	比较认同	比较认同	比较不认同	比较不认同	一般	比较认同	一般	认同	比较认同	比较认同	比较认同	比较认同	认同	认同	不认同	不认同	一般	比较认同	比较认同	比较不认同	比较不认同	一般	一般	非常认同	比较认同	女	41~50岁	农村	40年以上	比较满意	愿意	初中	务农	4-6万
215	60.222.151.17			2019-07-20 15:37:59	2019-07-20 15:46:41	Unknown Browser	iPhone iOS 12.2	8分42秒	正常完成	一般	比较认同	一般	比较认同	比较认同	比较不认同	一般	一般	比较不认同	一般	一般	比较认同	一般	比较认同	比较不认同	一般	比较不认同	不认同	一般	比较不认同	比较认同	比较认同	比较不认同	认同	认同	女	41~50岁	城镇	40年以上	一般	比较愿意	大学专科	事业单位	4-6万
216	219.243.215.212			2019-07-20 15:45:31	2019-07-20 15:48:42	Chrome 39.0.2171.95	Windows Wechat QBCore/3.43.1021.400 QQBrowser/9.0.2524.400	3分11秒	正常完成	比较认同	一般	比较不认同	一般	比较不认同	不认同	不认同	一般	比较不认同	比较不认同	一般	比较认同	一般	比较认同	比较认同	一般	一般	一般	不认同	不认同	一般	比较认同	不认同	比较认同	比较不认同	男	41~50岁	农村	31-40年	比较满意	愿意	高中/中专/技校	务农	4-6万
217	183.202.247.27			2019-07-20 15:46:52	2019-07-20 15:49:22	Chrome 66.0.3359.126	Android Linux 7.0	2分30秒	正常完成	比较认同	认同	认同	比较认同	认同	比较认同	比较认同	比较认同	认同	比较认同	认同	比较认同	认同	认同	比较认同	认同	比较认同	比较认同	比较不认同	不认同	比较认同	比较认同	一般	比较认同	认同	女	18岁-30岁	城镇	11-20年	满意	比较愿意	硕士研究生及以上	无业其他	3万及以下
218	60.222.98.206			2019-07-20 15:43:32	2019-07-20 15:50:01	Unknown Browser	iPhone iOS 12.3.1	6分29秒	正常完成	比较认同	比较认同	比较认同	比较认同	一般	一般	一般	比较认同	比较认同	比较认同	一般	一般	一般	比较不认同	一般	一般	比较不认同	比较不认同	比较不认同	一般	一般	一般	比较不认同	一般	不认同	女	41~50岁	城镇	21-30年	不满意	不愿意	大学专科	自由个体	10-12万
219	117.136.91.91			2019-07-20 15:48:59	2019-07-20 15:50:11	Unknown Browser	iPhone iOS 10.3.3	1分12秒	正常完成	一般	一般	一般	一般	一般	一般	一般	一般	一般	一般	一般	一般	一般	一般	一般	一般	一般	一般	一般	一般	一般	一般	一般	一般	一般	女	18岁-30岁	城镇	11-20年	一般	一般	大学本科	企业单位	10-12万
220	125.35.210.218			2019-07-20 15:25:17	2019-07-20 15:51:05	Chrome 39.0.2171.95	MacOS Macintosh X 10.12	25分48秒	正常完成	比较认同	一般	比较不认同	比较认同	比较认同	认同	比较认同	比较不认同	一般	比较认同	比较不认同	比较不认同	比较认同	比较不认同	比较认同	比较认同	比较不认同	一般	比较不认同	不认同	比较不认同	一般	不认同	比较认同	比较不认同	女	18岁-30岁	城镇	10年及以下	比较不满意	比较不愿意	硕士研究生及以上	无业其他	3万及以下
221	60.222.98.206			2019-07-20 15:52:05	2019-07-20 15:55:31	Unknown Browser	iPhone iOS 12.3.1	3分26秒	正常完成	认同	认同	比较认同	比较认同	一般	比较认同	比较认同	认同	比较认同	一般	一般	比较认同	比较认同	比较认同	认同	认同	比较认同	认同	一般	比较认同	认同	比较认同	认同	认同	比较认同	男	41~50岁	城镇	21-30年	比较满意	比较愿意	大学本科	机关单位	7-9万
222	183.200.108.84			2019-07-20 16:03:36	2019-07-20 16:05:57	Chrome 66.0.3359.126	Android Linux 9	2分21秒	正常完成	比较认同	认同	比较认同	比较认同	认同	比较认同	比较认同	认同	比较认同	比较认同	比较认同	一般	一般	比较认同	认同	认同	比较认同	比较认同	比较认同	比较认同	比较认同	比较认同	认同	比较认同	认同	女	31~40岁	农村	11-20年	满意	愿意	大学专科	务农	4-6万
223	218.26.54.198			2019-07-20 16:06:53	2019-07-20 16:10:41	Chrome 66.0.3359.126	Android Linux 8.0.0	3分48秒	正常完成	比较不认同	一般	比较不认同	一般	一般	比较不认同	一般	比较不认同	比较不认同	一般	一般	比较认同	一般	一般	比较认同	一般	比较不认同	比较不认同	一般	一般	一般	一般	一般	一般	比较不认同	女	18岁-30岁	城镇	21-30年	一般	愿意	硕士研究生及以上	事业单位	4-6万
224	183.200.108.84			2019-07-20 16:08:51	2019-07-20 16:10:55	Chrome 66.0.3359.126	Android Linux 6.0.1	2分4秒	正常完成	比较认同	比较认同	比较认同	认同	认同	比较认同	认同	认同	比较认同	一般	一般	比较认同	一般	一般	比较认同	认同	一般	比较认同	一般	一般	一般	比较认同	比较认同	比较认同	比较认同	男	41~50岁	城镇	21-30年	比较满意	比较愿意	大学专科	务农	4-6万
225	221.207.37.46			2019-07-20 16:06:16	2019-07-20 16:11:46	Chrome 67.0.3396.87	Android Linux 7.1.1	5分30秒	正常完成	一般	一般	比较不认同	比较不认同	比较不认同	不认同	比较不认同	比较不认同	一般	比较不认同	不认同	不认同	比较不认同	不认同	一般	比较认同	一般	一般	不认同	不认同	一般	一般	不认同	比较认同	认同	女	31~40岁	城镇	21-30年	比较不满意	比较愿意	硕士研究生及以上	机关单位	4-6万
226	220.115.30.189			2019-07-20 16:32:31	2019-07-20 16:33:27	Unknown Browser	iPhone iOS 12.3.1	0分56秒	正常完成	比较认同	认同	认同	比较不认同	不认同	比较认同	比较不认同	比较认同	比较认同	比较认同	比较不认同	比较认同	认同	认同	不认同	一般	一般	比较不认同	比较不认同	比较认同	比较不认同	比较认同	比较认同	比较认同	一般	女	60岁以上	农村	31-40年	比较不满意	比较愿意	初中	务农	4-6万
227	223.104.3.36			2019-07-20 16:37:12	2019-07-20 16:39:53	Unknown Browser	iPhone iOS 12.3.1	2分41秒	正常完成	比较认同	比较认同	认同	比较认同	认同	比较认同	比较认同	比较认同	比较认同	比较认同	比较认同	认同	认同	一般	一般	比较认同	比较认同	比较认同	不认同	不认同	一般	比较认同	比较认同	比较认同	非常认同	男	18岁-30岁	城镇	10年及以下	比较满意	愿意	大学本科	企业单位	7-9万
228	220.115.30.189			2019-07-20 16:38:17	2019-07-20 16:40:59	Unknown Browser	iPhone iOS 12.3.1	2分42秒	正常完成	认同	认同	比较不认同	比较不认同	一般	一般	比较不认同	比较认同	比较不认同	一般	比较认同	比较不认同	比较不认同	认同	比较认同	比较认同	认同	一般	一般	不认同	比较不认同	比较认同	比较不认同	认同	比较不认同	女	41~50岁	农村	40年以上	比较不满意	愿意	初中	务农	4-6万
229	183.200.108.84			2019-07-20 16:48:49	2019-07-20 16:55:26	Chrome 66.0.3359.126	Android Linux 6.0.1	6分37秒	正常完成	比较认同	认同	一般	比较认同	认同	非常认同	比较认同	非常认同	非常认同	非常认同	认同	非常认同	非常认同	非常认同	非常认同	认同	认同	非常认同	非常认同	认同	比较认同	认同	比较认同	非常认同	认同	女	51~60岁	城镇	40年以上	非常满意	非常愿意	初中	务农	3万及以下
230	36.98.118.34			2019-07-20 17:03:33	2019-07-20 17:06:16	Unknown Browser	iPhone iOS 12.2	2分43秒	正常完成	比较认同	比较认同	比较认同	认同	认同	认同	认同	认同	认同	比较认同	认同	比较认同	认同	认同	认同	比较认同	比较认同	比较认同	比较认同	比较认同	比较认同	比较认同	比较认同	比较认同	比较认同	男	18岁-30岁	农村	21-30年	比较满意	比较愿意	大学本科	企业单位	13万及以上
231	218.26.54.166			2019-07-20 17:28:30	2019-07-20 17:35:07	Chrome 66.0.3359.126	Android Linux 5.1.1	6分37秒	正常完成	认同	比较认同	认同	比较认同	认同	比较认同	认同	认同	比较认同	认同	认同	认同	认同	认同	认同	认同	认同	比较认同	比较认同	认同	比较认同	认同	一般	认同	一般	女	51~60岁	城镇	40年以上	比较满意	愿意	大学专科	事业单位	4-6万
232	124.238.169.64			2019-07-20 17:56:22	2019-07-20 17:57:19	Unknown Browser	iPhone iOS 12.3.1	0分57秒	正常完成	一般	一般	一般	一般	一般	一般	一般	一般	一般	认同	一般	比较认同	一般	比较认同	比较认同	一般	不认同	一般	比较不认同	比较不认同	比较认同	认同	认同	比较认同	一般	男	31~40岁	城镇	10年及以下	满意	愿意	初中	企业单位	7-9万
233	1.68.60.94			2019-07-20 18:15:20	2019-07-20 18:18:05	Unknown Browser	iPhone iOS 12.1.4	2分45秒	正常完成	一般	一般	一般	一般	一般	一般	一般	一般	一般	一般	一般	一般	一般	一般	一般	一般	一般	一般	不认同	一般	一般	一般	不认同	认同	比较不认同	男	18岁-30岁	城镇	11-20年	一般	比较不愿意	大学本科	企业单位	7-9万
234	223.104.13.23			2019-07-20 18:24:45	2019-07-20 18:31:31	Unknown Browser	iPhone iOS 9.2.1	6分46秒	正常完成	一般	认同	一般	认同	不认同	不认同	不认同	不认同	不认同	不认同	比较不认同	一般	不认同	不认同	不认同	不认同	不认同	不认同	不认同	不认同	比较不认同	一般	比较不认同	认同	比较不认同	男	18岁-30岁	城镇	10年及以下	满意	愿意	大学本科	企业单位	13万及以上
235	223.104.14.187			2019-07-20 23:01:34	2019-07-20 23:14:30	Chrome 66.0.3359.126	Android Linux 9	12分56秒	正常完成	比较不认同	不认同	不认同	不认同	非常不认同	非常不认同	不认同	不认同	不认同	非常不认同	不认同	不认同	非常不认同	不认同	不认同	不认同	不认同	不认同	非常不认同	不认同	不认同	不认同	不认同	比较不认同	不认同	男	51~60岁	城镇	21-30年	不满意	比较不愿意	大学专科	机关单位	7-9万
236	117.59.84.43			2019-07-21 09:07:50	2019-07-21 09:09:41	Unknown Browser	iPhone iOS 12.1	1分51秒	正常完成	比较认同	比较认同	认同	认同	认同	认同	认同	认同	认同	比较认同	一般	比较认同	非常认同	非常认同	比较认同	认同	认同	认同	认同	比较认同	比较认同	非常认同	一般	非常认同	非常认同	女	18岁-30岁	城镇	11-20年	满意	愿意	大学本科	自由个体	3万及以下
237	117.136.54.130			2019-07-21 09:19:40	2019-07-21 09:20:48	Chrome 66.0.3359.126	Android Linux 9	1分8秒	正常完成	认同	认同	认同	认同	比较认同	比较认同	比较认同	认同	认同	一般	比较认同	比较不认同	比较认同	比较认同	比较认同	比较认同	比较认同	认同	认同	比较认同	一般	一般	认同	比较认同	比较认同	男	18岁-30岁	城镇	10年及以下	比较满意	比较愿意	硕士研究生及以上	无业其他	3万及以下
238	111.53.67.142			2019-07-21 11:45:58	2019-07-21 11:50:43	Unknown Browser	iPhone iOS 12.3.1	4分45秒	正常完成	一般	一般	一般	一般	一般	一般	一般	一般	一般	一般	一般	一般	比较认同	一般	一般	一般	一般	一般	一般	比较不认同	一般	一般	比较不认同	比较认同	一般	男	51~60岁	城镇	31-40年	一般	一般	大学本科	机关单位	7-9万
239	218.26.55.196			2019-07-21 13:03:37	2019-07-21 13:08:47	Unknown Browser	iPhone iOS 12.3.1	5分10秒	正常完成	认同	比较认同	一般	一般	一般	比较认同	比较认同	比较认同	比较认同	一般	一般	一般	一般	一般	一般	一般	比较认同	一般	不认同	不认同	一般	一般	一般	认同	比较不认同	女	41~50岁	城镇	31-40年	比较不满意	愿意	大学专科	事业单位	7-9万
240	223.104.7.138			2019-07-21 15:33:34	2019-07-21 15:35:45	Chrome 66.0.3359.126	Android Linux 9	2分11秒	正常完成	认同	认同	比较认同	比较认同	认同	非常认同	一般	认同	非常认同	比较认同	认同	比较认同	非常认同	比较认同	认同	比较认同	认同	比较认同	非常认同	认同	比较认同	非常认同	比较认同	一般	认同	男	31~40岁	城镇	10年及以下	满意	愿意	硕士研究生及以上	事业单位	10-12万
241	60.25.153.172			2019-07-21 18:18:37	2019-07-21 18:21:25	Opera	Android Linux 8.0.0	2分48秒	正常完成	比较认同	比较认同	认同	认同	比较认同	一般	一般	比较认同	比较认同	非常认同	认同	非常认同	认同	认同	认同	认同	一般	比较认同	一般	不认同	认同	认同	非常不认同	非常认同	不认同	男	18岁-30岁	城镇	21-30年	比较满意	愿意	大学专科	事业单位	4-6万
242	220.115.30.182			2019-07-21 18:41:09	2019-07-21 18:42:29	Unknown Browser	iPhone iOS 12.3.1	1分20秒	正常完成	不认同	不认同	不认同	不认同	不认同	不认同	不认同	不认同	比较不认同	比较不认同	比较不认同	比较不认同	不认同	不认同	比较不认同	不认同	不认同	不认同	不认同	比较不认同	不认同	比较不认同	不认同	比较不认同	比较不认同	女	41~50岁	农村	21-30年	比较不满意	一般	初中	务农	3万及以下
243	220.115.30.182			2019-07-21 18:42:48	2019-07-21 18:48:37	Unknown Browser	iPhone iOS 12.3.1	5分49秒	正常完成	比较不认同	不认同	不认同	比较不认同	比较不认同	不认同	比较不认同	比较不认同	不认同	比较不认同	一般	一般	不认同	一般	一般	比较不认同	比较不认同	比较不认同	不认同	比较不认同	比较不认同	不认同	一般	比较不认同	不认同	女	41~50岁	农村	21-30年	不满意	一般	初中	务农	3万及以下
244	111.167.46.224			2019-07-21 20:45:54	2019-07-21 20:47:47	Unknown Browser	iPhone iOS 12.3.1	1分53秒	正常完成	一般	一般	比较不认同	一般	一般	比较不认同	比较不认同	一般	一般	比较不认同	比较不认同	一般	比较不认同	比较不认同	比较不认同	一般	比较不认同	一般	不认同	比较不认同	比较不认同	比较不认同	比较不认同	一般	一般	男	18岁-30岁	城镇	11-20年	一般	一般	硕士研究生及以上	企业单位	10-12万
245	111.167.46.224			2019-07-21 20:45:54	2019-07-21 20:48:30	Unknown Browser	iPhone iOS 12.3.1	2分36秒	正常完成	一般	不认同	不认同	比较不认同	不认同	不认同	比较不认同	一般	一般	比较不认同	不认同	不认同	比较不认同	一般	比较不认同	比较不认同	比较不认同	比较不认同	一般	比较不认同	比较不认同	一般	一般	一般	一般	男	31~40岁	城镇	10年及以下	一般	比较愿意	硕士研究生及以上	企业单位	4-6万
246	183.200.18.226			2019-07-21 23:21:12	2019-07-21 23:26:27	Unknown Browser	iPhone iOS 12.1.2	5分15秒	正常完成	比较认同	一般	一般	比较认同	比较不认同	认同	一般	比较认同	比较不认同	比较不认同	比较认同	一般	一般	比较认同	一般	认同	比较认同	一般	比较不认同	不认同	一般	比较认同	非常不认同	不认同	比较认同	男	31~40岁	城镇	11-20年	一般	比较愿意	大学本科	企业单位	10-12万
247	117.136.54.8			2019-07-22 09:14:57	2019-07-22 09:17:05	Unknown Browser	iPhone iOS 12.3.1	2分8秒	正常完成	比较不认同	比较不认同	比较不认同	一般	一般	不认同	比较不认同	比较认同	比较认同	比较认同	一般	比较不认同	比较认同	比较认同	比较认同	比较认同	一般	非常不认同	不认同	不认同	比较不认同	一般	不认同	一般	不认同	女	51~60岁	农村	10年及以下	一般	比较不愿意	高中/中专/技校	自由个体	10-12万
248	117.136.55.99			2019-07-22 12:00:38	2019-07-22 12:02:17	Unknown Browser	iPhone iOS 12.3.1	1分39秒	正常完成	非常认同	认同	比较认同	非常认同	认同	一般	非常认同	比较认同	非常认同	比较认同	非常认同	不认同	认同	一般	非常认同	比较认同	非常认同	比较认同	非常认同	比较不认同	非常认同	比较认同	比较不认同	认同	一般	女	31~40岁	农村	21-30年	比较满意	比较愿意	高中/中专/技校	企业单位	10-12万
249	117.136.55.99			2019-07-22 12:02:22	2019-07-22 12:03:46	Unknown Browser	iPhone iOS 12.3.1	1分24秒	正常完成	比较不认同	比较不认同	一般	比较不认同	一般	比较不认同	比较不认同	一般	一般	比较不认同	比较不认同	比较不认同	不认同	不认同	比较不认同	不认同	不认同	比较不认同	不认同	非常不认同	一般	一般	不认同	不认同	不认同	男	41~50岁	农村	40年以上	比较不满意	比较不愿意	小学及以下	务农	3万及以下
250	111.31.244.172			2019-07-22 12:05:18	2019-07-22 12:09:30	Chrome 66.0.3359.126	Android Linux 8.1.0	4分12秒	正常完成	一般	比较不认同	比较认同	比较不认同	比较认同	比较认同	比较认同	比较不认同	比较认同	比较不认同	一般	不认同	一般	比较认同	一般	不认同	比较认同	非常认同	比较不认同	非常不认同	认同	一般	比较认同	比较不认同	比较认同	女	18岁-30岁	农村	21-30年	非常满意	愿意	初中	企业单位	7-9万
251	117.136.55.99			2019-07-22 12:07:52	2019-07-22 12:09:56	Unknown Browser	iPhone iOS 12.3.1	2分4秒	正常完成	一般	比较不认同	比较不认同	比较不认同	一般	比较不认同	一般	一般	比较不认同	一般	比较不认同	比较不认同	比较不认同	比较不认同	一般	一般	一般	一般	一般	一般	比较不认同	比较不认同	一般	一般	比较不认同	男	18岁-30岁	农村	11-20年	比较不满意	比较不愿意	高中/中专/技校	无业其他	4-6万
252	117.136.55.99			2019-07-22 12:10:08	2019-07-22 12:12:10	Unknown Browser	iPhone iOS 12.3.1	2分2秒	正常完成	认同	非常认同	认同	比较认同	非常认同	比较认同	非常认同	非常认同	认同	非常认同	一般	认同	一般	比较不认同	非常认同	比较认同	非常认同	比较认同	非常认同	比较不认同	比较认同	非常认同	比较认同	一般	非常认同	女	31~40岁	农村	11-20年	满意	愿意	初中	企业单位	10-12万
253	111.31.244.172			2019-07-22 12:12:00	2019-07-22 12:14:50	Chrome 66.0.3359.126	Android Linux 8.1.0	2分50秒	正常完成	非常认同	认同	比较认同	认同	一般	认同	比较不认同	非常认同	一般	非常认同	比较认同	非常认同	比较不认同	认同	认同	比较不认同	非常认同	一般	比较认同	认同	非常认同	一般	非常认同	比较不认同	认同	女	31~40岁	农村	31-40年	满意	愿意	初中	企业单位	10-12万
254	117.136.55.99			2019-07-22 12:13:30	2019-07-22 12:15:03	Unknown Browser	iPhone iOS 12.3.1	1分33秒	正常完成	认同	认同	非常认同	比较认同	比较认同	一般	比较认同	非常认同	认同	比较认同	一般	比较不认同	一般	一般	比较不认同	一般	不认同	非常不认同	非常不认同	非常不认同	一般	一般	非常不认同	一般	非常认同	女	60岁以上	农村	31-40年	满意	一般	初中	务农	10-12万
255	117.136.55.99			2019-07-22 12:15:24	2019-07-22 12:17:27	Unknown Browser	iPhone iOS 12.3.1	2分3秒	正常完成	不认同	比较不认同	一般	一般	一般	比较认同	一般	认同	一般	一般	一般	不认同	认同	一般	一般	不认同	比较不认同	不认同	不认同	不认同	一般	一般	非常不认同	非常不认同	比较认同	男	31~40岁	农村	21-30年	比较满意	愿意	初中	企业单位	10-12万
256	117.136.55.99			2019-07-22 12:17:36	2019-07-22 12:19:28	Unknown Browser	iPhone iOS 12.3.1	1分52秒	正常完成	非常认同	比较认同	非常认同	一般	非常认同	一般	非常认同	非常认同	认同	一般	认同	比较认同	非常认同	比较不认同	非常认同	一般	认同	比较认同	认同	比较不认同	非常认同	比较认同	非常认同	一般	比较不认同	女	31~40岁	农村	11-20年	满意	愿意	高中/中专/技校	企业单位	7-9万
257	111.31.244.172			2019-07-22 12:17:10	2019-07-22 12:19:59	Chrome 66.0.3359.126	Android Linux 8.1.0	2分49秒	正常完成	比较认同	认同	比较认同	非常认同	一般	非常认同	比较不认同	比较认同	比较不认同	非常认同	一般	认同	一般	非常认同	比较认同	比较不认同	非常认同	一般	认同	比较不认同	非常认同	比较认同	一般	认同	比较不认同	女	31~40岁	农村	21-30年	满意	愿意	初中	企业单位	7-9万
258	117.136.55.99			2019-07-22 12:19:39	2019-07-22 12:21:28	Unknown Browser	iPhone iOS 12.3.1	1分49秒	正常完成	一般	非常认同	比较认同	认同	一般	认同	比较不认同	认同	比较认同	非常认同	认同	比较不认同	比较认同	一般	认同	比较认同	一般	比较认同	比较不认同	不认同	认同	非常认同	非常认同	认同	一般	男	31~40岁	农村	21-30年	比较满意	比较愿意	初中	企业单位	13万及以上
259	111.31.244.172			2019-07-22 12:20:08	2019-07-22 12:22:16	Chrome 66.0.3359.126	Android Linux 8.1.0	2分8秒	正常完成	非常认同	比较认同	认同	比较认同	一般	一般	一般	一般	比较认同	比较认同	认同	一般	比较认同	比较认同	认同	比较认同	一般	比较不认同	比较不认同	比较不认同	比较认同	比较认同	一般	一般	一般	女	18岁-30岁	农村	21-30年	满意	愿意	初中	企业单位	10-12万
260	117.136.55.99			2019-07-22 12:21:36	2019-07-22 12:23:15	Unknown Browser	iPhone iOS 12.3.1	1分39秒	正常完成	一般	一般	一般	一般	一般	一般	比较不认同	一般	比较认同	一般	一般	比较认同	一般	一般	比较认同	比较认同	一般	一般	一般	比较不认同	一般	一般	比较不认同	一般	一般	男	51~60岁	农村	40年以上	比较满意	愿意	初中	务农	3万及以下
261	117.136.55.99			2019-07-22 12:23:22	2019-07-22 12:24:59	Unknown Browser	iPhone iOS 12.3.1	1分37秒	正常完成	认同	一般	一般	非常认同	认同	一般	不认同	非常认同	不认同	认同	非常认同	非常不认同	认同	认同	认同	非常认同	认同	比较认同	非常不认同	非常不认同	认同	非常认同	一般	认同	非常认同	男	41~50岁	农村	21-30年	比较满意	比较愿意	初中	企业单位	7-9万
262	111.31.244.172			2019-07-22 12:22:58	2019-07-22 12:25:37	Chrome 66.0.3359.126	Android Linux 8.1.0	2分39秒	正常完成	一般	一般	比较认同	比较认同	比较认同	比较认同	比较认同	比较认同	一般	一般	非常认同	不认同	比较认同	比较不认同	一般	比较不认同	比较认同	比较不认同	非常不认同	非常不认同	一般	一般	非常不认同	一般	非常不认同	男	41~50岁	农村	31-40年	比较不满意	比较不愿意	小学及以下	务农	3万及以下
263	117.136.55.99			2019-07-22 12:25:12	2019-07-22 12:26:52	Unknown Browser	iPhone iOS 12.3.1	1分40秒	正常完成	一般	比较认同	非常认同	非常认同	非常认同	比较认同	比较不认同	比较不认同	不认同	比较认同	一般	非常不认同	认同	比较认同	非常认同	认同	非常认同	非常认同	不认同	非常不认同	一般	比较认同	一般	非常认同	比较认同	女	31~40岁	农村	11-20年	比较满意	比较愿意	高中/中专/技校	企业单位	7-9万
264	117.136.55.99			2019-07-22 12:27:02	2019-07-22 12:28:37	Unknown Browser	iPhone iOS 12.3.1	1分35秒	正常完成	一般	比较认同	一般	一般	一般	一般	一般	一般	比较认同	一般	一般	一般	比较认同	比较认同	一般	比较认同	一般	一般	一般	一般	一般	一般	比较不认同	一般	一般	女	51~60岁	城镇	31-40年	一般	愿意	大学本科	事业单位	4-6万
265	111.31.244.172			2019-07-22 12:25:45	2019-07-22 12:29:07	Chrome 66.0.3359.126	Android Linux 8.1.0	3分22秒	正常完成	认同	认同	比较认同	比较认同	比较认同	认同	认同	认同	比较认同	一般	一般	认同	认同	认同	认同	比较认同	一般	比较认同	比较认同	比较认同	比较认同	比较认同	一般	一般	一般	女	41~50岁	农村	21-30年	比较满意	愿意	初中	自由个体	3万及以下
266	117.136.55.99			2019-07-22 12:28:46	2019-07-22 12:30:58	Unknown Browser	iPhone iOS 12.3.1	2分12秒	正常完成	比较认同	一般	比较认同	非常认同	比较不认同	比较认同	非常认同	一般	非常认同	比较不认同	认同	一般	非常认同	认同	比较认同	非常认同	比较认同	非常认同	一般	非常认同	非常认同	比较认同	认同	一般	非常认同	男	31~40岁	农村	21-30年	满意	愿意	小学及以下	企业单位	10-12万
267	111.31.244.172			2019-07-22 12:29:11	2019-07-22 12:31:23	Chrome 66.0.3359.126	Android Linux 8.1.0	2分12秒	正常完成	认同	比较认同	一般	一般	比较认同	认同	比较认同	比较认同	比较认同	比较认同	认同	比较认同	比较认同	比较认同	一般	一般	一般	一般	比较认同	比较认同	比较认同	比较认同	比较认同	比较认同	比较认同	男	31~40岁	农村	21-30年	满意	愿意	初中	企业单位	13万及以上
268	117.136.55.99			2019-07-22 12:31:04	2019-07-22 12:33:20	Unknown Browser	iPhone iOS 12.3.1	2分16秒	正常完成	认同	比较认同	比较认同	认同	一般	非常认同	比较认同	认同	非常认同	比较认同	一般	比较认同	比较认同	比较认同	认同	认同	一般	一般	比较不认同	一般	比较认同	比较认同	认同	一般	一般	女	60岁以上	农村	40年以上	非常满意	一般	初中	务农	3万及以下
269	111.31.244.172			2019-07-22 12:31:36	2019-07-22 12:35:05	Chrome 66.0.3359.126	Android Linux 8.1.0	3分29秒	正常完成	一般	一般	比较不认同	比较不认同	比较不认同	一般	比较认同	一般	比较认同	比较认同	一般	比较认同	比较不认同	一般	认同	比较认同	一般	不认同	不认同	比较不认同	不认同	比较不认同	一般	一般	一般	男	51~60岁	农村	40年以上	一般	一般	小学及以下	务农	4-6万
270	117.136.55.99			2019-07-22 12:33:48	2019-07-22 12:35:30	Unknown Browser	iPhone iOS 12.3.1	1分42秒	正常完成	认同	比较认同	一般	比较认同	认同	比较认同	比较认同	一般	一般	比较认同	认同	一般	比较认同	认同	一般	一般	一般	一般	一般	一般	认同	比较认同	比较认同	认同	比较认同	男	41~50岁	农村	31-40年	比较满意	比较愿意	初中	企业单位	13万及以上
271	117.136.55.99			2019-07-22 12:35:38	2019-07-22 12:37:31	Unknown Browser	iPhone iOS 12.3.1	1分53秒	正常完成	一般	比较认同	比较认同	一般	一般	一般	比较不认同	一般	一般	一般	一般	一般	比较认同	比较认同	比较认同	比较认同	比较认同	比较认同	一般	比较不认同	一般	一般	一般	一般	一般	女	31~40岁	农村	21-30年	比较满意	比较愿意	高中/中专/技校	企业单位	7-9万
272	117.136.55.99			2019-07-22 12:37:37	2019-07-22 12:39:06	Unknown Browser	iPhone iOS 12.3.1	1分29秒	正常完成	认同	一般	比较认同	认同	非常认同	比较认同	一般	认同	比较认同	一般	比较认同	认同	比较认同	一般	一般	一般	一般	比较认同	比较认同	比较认同	比较认同	比较认同	比较认同	一般	比较认同	女	31~40岁	农村	21-30年	满意	愿意	高中/中专/技校	企业单位	10-12万
273	111.31.244.172			2019-07-22 12:35:11	2019-07-22 12:39:08	Chrome 66.0.3359.126	Android Linux 8.1.0	3分57秒	正常完成	非常认同	认同	比较认同	非常认同	一般	非常认同	非常认同	认同	一般	认同	一般	认同	一般	比较认同	认同	一般	认同	一般	认同	一般	非常认同	比较认同	非常认同	一般	认同	男	41~50岁	农村	31-40年	满意	愿意	小学及以下	企业单位	13万及以上
274	117.136.55.99			2019-07-22 12:39:10	2019-07-22 12:40:46	Unknown Browser	iPhone iOS 12.3.1	1分36秒	正常完成	比较认同	非常认同	认同	比较认同	一般	认同	比较认同	比较认同	认同	比较认同	一般	认同	比较不认同	非常认同	非常认同	认同	一般	非常认同	比较认同	非常认同	非常认同	比较认同	非常认同	认同	比较不认同	男	51~60岁	农村	31-40年	满意	愿意	小学及以下	企业单位	7-9万
275	111.31.244.172			2019-07-22 12:39:12	2019-07-22 12:41:25	Chrome 66.0.3359.126	Android Linux 8.1.0	2分13秒	正常完成	一般	一般	一般	一般	比较认同	一般	认同	认同	比较认同	比较认同	一般	比较认同	比较认同	比较认同	一般	一般	一般	一般	一般	一般	比较认同	认同	比较认同	一般	一般	男	51~60岁	农村	40年以上	比较满意	比较愿意	初中	企业单位	10-12万
276	117.136.55.99			2019-07-22 12:42:04	2019-07-22 12:42:59	Unknown Browser	iPhone iOS 12.3.1	0分55秒	正常完成	认同	不认同	一般	比较认同	比较认同	比较不认同	比较认同	比较认同	一般	一般	一般	比较不认同	比较不认同	比较认同	不认同	比较不认同	比较不认同	比较不认同	比较不认同	一般	认同	一般	比较不认同	比较认同	比较不认同	女	51~60岁	农村	31-40年	比较满意	愿意	小学及以下	务农	4-6万
277	111.31.244.172			2019-07-22 12:41:29	2019-07-22 12:43:31	Chrome 66.0.3359.126	Android Linux 8.1.0	2分2秒	正常完成	认同	认同	比较认同	比较认同	比较认同	比较认同	比较认同	比较认同	比较认同	比较认同	比较认同	比较不认同	比较不认同	一般	比较不认同	比较不认同	一般	比较不认同	比较不认同	比较不认同	比较认同	比较认同	比较认同	比较认同	比较认同	女	31~40岁	农村	21-30年	比较满意	比较愿意	初中	企业单位	7-9万
278	117.136.55.99			2019-07-22 12:45:17	2019-07-22 12:46:15	Unknown Browser	iPhone iOS 12.3.1	0分58秒	正常完成	比较认同	比较认同	一般	比较认同	一般	比较不认同	比较认同	比较认同	比较认同	比较不认同	比较不认同	比较不认同	比较认同	一般	比较不认同	比较认同	一般	比较不认同	比较不认同	比较不认同	比较认同	比较认同	一般	认同	认同	男	41~50岁	农村	21-30年	比较满意	比较愿意	高中/中专/技校	企业单位	10-12万
279	111.31.244.172			2019-07-22 12:43:37	2019-07-22 12:46:23	Chrome 66.0.3359.126	Android Linux 8.1.0	2分46秒	正常完成	比较不认同	一般	不认同	比较不认同	非常不认同	比较认同	不认同	一般	不认同	比较认同	不认同	认同	非常不认同	比较不认同	不认同	比较不认同	非常不认同	比较不认同	非常不认同	比较认同	不认同	比较不认同	非常不认同	一般	非常认同	男	41~50岁	农村	31-40年	比较不满意	不愿意	小学及以下	企业单位	7-9万
280	117.136.55.99			2019-07-22 12:47:09	2019-07-22 12:48:15	Unknown Browser	iPhone iOS 12.3.1	1分6秒	正常完成	比较认同	非常认同	认同	认同	认同	比较认同	比较不认同	比较认同	比较认同	一般	一般	比较不认同	一般	比较认同	一般	比较认同	比较不认同	比较不认同	比较不认同	比较不认同	比较认同	比较认同	比较不认同	认同	比较认同	男	41~50岁	农村	31-40年	比较满意	比较愿意	初中	企业单位	10-12万
281	111.31.244.172			2019-07-22 12:46:28	2019-07-22 12:48:58	Chrome 66.0.3359.126	Android Linux 8.1.0	2分30秒	正常完成	认同	认同	比较认同	比较认同	一般	比较不认同	不认同	认同	认同	认同	认同	认同	认同	认同	比较不认同	一般	比较不认同	比较不认同	非常不认同	非常不认同	一般	一般	不认同	不认同	不认同	男	31~40岁	农村	31-40年	一般	一般	初中	企业单位	13万及以上
282	117.136.54.6			2019-07-22 20:36:08	2019-07-22 20:39:11	Unknown Browser	iPhone iOS 12.3.1	3分3秒	正常完成	比较不认同	一般	一般	比较认同	一般	一般	比较不认同	一般	一般	比较认同	一般	比较认同	比较认同	比较认同	比较不认同	一般	一般	一般	不认同	不认同	一般	一般	认同	一般	比较不认同	女	18岁-30岁	城镇	10年及以下	一般	愿意	硕士研究生及以上	无业其他	3万及以下
283	117.136.54.64			2019-07-22 20:34:16	2019-07-22 20:43:49	Unknown Browser	iPhone iOS 11.4	9分33秒	正常完成	比较认同	一般	比较认同	一般	比较不认同	认同	一般	比较不认同	一般	比较认同	比较认同	比较不认同	比较认同	比较不认同	比较不认同	不认同	一般	比较认同	非常不认同	认同	比较认同	一般	比较认同	认同	比较不认同	男	18岁-30岁	城镇	11-20年	满意	愿意	大学本科	无业其他	3万及以下
284	117.10.152.135			2019-07-22 22:05:23	2019-07-22 22:07:34	Chrome 66.0.3359.126	Android Linux 8.1.0	2分11秒	正常完成	认同	认同	一般	一般	比较认同	比较认同	比较认同	比较认同	认同	一般	比较认同	比较认同	认同	认同	比较认同	认同	认同	比较认同	认同	认同	认同	非常认同	非常认同	认同	比较认同	女	18岁-30岁	城镇	10年及以下	比较满意	比较愿意	硕士研究生及以上	无业其他	3万及以下
285	211.94.242.18			2019-07-22 22:06:09	2019-07-22 22:09:23	Chrome 66.0.3359.126	Android Linux 8.1.0	3分14秒	正常完成	比较不认同	一般	比较认同	比较认同	比较不认同	比较认同	比较不认同	比较不认同	比较认同	比较认同	比较认同	一般	比较不认同	比较认同	比较认同	一般	比较不认同	一般	比较不认同	比较不认同	一般	一般	不认同	一般	认同	女	18岁-30岁	城镇	10年及以下	比较不满意	比较愿意	硕士研究生及以上	无业其他	3万及以下
286	117.136.38.62			2019-07-22 22:05:26	2019-07-22 22:09:36	Chrome 66.0.3359.126	Android Linux 9	4分10秒	正常完成	比较不认同	比较不认同	比较不认同	一般	一般	不认同	比较不认同	比较认同	比较不认同	一般	比较认同	一般	一般	一般	不认同	不认同	一般	不认同	不认同	比较不认同	一般	一般	一般	一般	一般	女	18岁-30岁	城镇	10年及以下	一般	比较不愿意	硕士研究生及以上	自由个体	3万及以下
287	221.192.179.213			2019-07-22 22:08:16	2019-07-22 22:11:54	Chrome 70.0.3538.110	Android Linux 9	3分38秒	正常完成	认同	认同	认同	认同	认同	认同	比较认同	认同	认同	认同	认同	认同	非常认同	认同	认同	认同	认同	认同	认同	认同	比较认同	认同	一般	比较认同	认同	女	18岁-30岁	农村	21-30年	满意	愿意	大学本科	无业其他	3万及以下
288	211.94.246.29			2019-07-22 22:17:22	2019-07-22 22:20:34	Unknown Browser	iPhone iOS 12.3.1	3分12秒	正常完成	一般	一般	比较不认同	一般	一般	一般	一般	一般	一般	一般	一般	一般	一般	一般	一般	一般	一般	比较不认同	比较不认同	比较不认同	一般	一般	一般	一般	一般	女	18岁-30岁	城镇	10年及以下	比较不满意	比较愿意	硕士研究生及以上	事业单位	7-9万
289	223.104.7.111			2019-07-22 23:10:14	2019-07-22 23:11:47	Unknown Browser	iPhone iOS 10.3.2	1分33秒	正常完成	一般	一般	一般	一般	一般	一般	一般	一般	一般	一般	一般	一般	一般	一般	一般	一般	一般	一般	一般	一般	一般	一般	一般	一般	一般	女	18岁-30岁	城镇	10年及以下	一般	比较愿意	大学本科	无业其他	3万及以下
290	223.104.3.50			2019-07-23 10:36:24	2019-07-23 10:37:21	Unknown Browser	iPhone iOS 12.3.1	0分57秒	正常完成	不认同	不认同	不认同	不认同	不认同	不认同	不认同	不认同	不认同	不认同	不认同	不认同	不认同	不认同	不认同	不认同	不认同	不认同	不认同	不认同	不认同	不认同	不认同	不认同	不认同	男	51~60岁	农村	40年以上	不满意	比较愿意	小学及以下	务农	3万及以下
291	223.104.3.50			2019-07-23 10:37:54	2019-07-23 10:39:00	Unknown Browser	iPhone iOS 12.3.1	1分6秒	正常完成	比较不认同	比较不认同	比较不认同	比较不认同	不认同	不认同	比较不认同	不认同	不认同	比较不认同	比较不认同	不认同	比较不认同	不认同	不认同	比较不认同	比较不认同	不认同	不认同	比较不认同	比较不认同	不认同	不认同	不认同	不认同	女	60岁以上	农村	40年以上	不满意	愿意	小学及以下	务农	3万及以下
292	61.148.243.63			2019-07-23 10:39:26	2019-07-23 10:40:40	Unknown Browser	iPhone iOS 12.3.1	1分14秒	正常完成	一般	一般	比较不认同	比较不认同	一般	不认同	一般	一般	比较不认同	比较不认同	一般	比较认同	比较不认同	一般	比较认同	一般	比较不认同	比较认同	一般	比较不认同	比较不认同	比较不认同	比较不认同	比较不认同	一般	男	31~40岁	农村	21-30年	比较不满意	比较不愿意	初中	务农	4-6万
293	124.202.171.222			2019-07-23 10:37:38	2019-07-23 10:40:55	Chrome 66.0.3359.126	Android Linux 9	3分17秒	正常完成	非常认同	非常认同	非常认同	比较认同	比较认同	比较认同	比较认同	比较认同	比较认同	比较认同	比较认同	比较认同	比较认同	比较认同	比较认同	比较认同	比较认同	比较认同	比较认同	比较认同	比较认同	比较认同	比较认同	比较认同	比较认同	男	31~40岁	农村	10年及以下	非常满意	非常愿意	大学专科	企业单位	10-12万
294	61.148.243.63			2019-07-23 10:40:50	2019-07-23 10:42:05	Unknown Browser	iPhone iOS 12.3.1	1分15秒	正常完成	比较不认同	不认同	比较不认同	比较不认同	比较不认同	不认同	比较不认同	比较不认同	比较不认同	不认同	比较不认同	比较不认同	比较不认同	一般	比较不认同	比较不认同	比较不认同	比较不认同	比较不认同	一般	一般	一般	一般	一般	一般	女	41~50岁	农村	31-40年	比较不满意	比较不愿意	初中	务农	4-6万
295	27.207.230.80			2019-07-23 10:41:43	2019-07-23 10:43:42	Chrome 66.0.3359.126	Android Linux 8.1.0	1分59秒	正常完成	比较认同	比较认同	一般	一般	比较认同	认同	比较认同	比较认同	认同	一般	一般	不认同	比较不认同	认同	比较认同	比较认同	非常认同	认同	一般	非常认同	一般	比较认同	比较认同	一般	一般	男	18岁-30岁	农村	10年及以下	一般	比较愿意	硕士研究生及以上	务农	3万及以下
296	210.12.83.67			2019-07-23 10:38:45	2019-07-23 10:43:54	Unknown Browser	iPhone iOS 12.3.1	5分9秒	正常完成	比较不认同	比较不认同	一般	一般	一般	一般	一般	一般	比较不认同	一般	一般	一般	一般	比较不认同	一般	一般	一般	一般	比较不认同	比较不认同	一般	一般	一般	一般	一般	男	31~40岁	城镇	10年及以下	一般	一般	硕士研究生及以上	事业单位	13万及以上
297	211.94.230.66			2019-07-23 10:43:19	2019-07-23 10:44:05	Unknown Browser	iPhone iOS 12.3.1	0分46秒	正常完成	非常认同	认同	比较认同	比较认同	认同	认同	一般	认同	认同	认同	认同	比较认同	比较认同	认同	认同	比较认同	一般	比较认同	认同	认同	认同	比较认同	非常认同	认同	认同	男	18岁-30岁	城镇	11-20年	非常满意	愿意	硕士研究生及以上	机关单位	3万及以下
298	211.94.252.22			2019-07-23 10:50:09	2019-07-23 10:53:26	Unknown Browser	iPhone iOS 12.1.4	3分17秒	正常完成	比较不认同	比较不认同	比较不认同	一般	一般	比较认同	比较认同	一般	一般	比较认同	一般	一般	比较认同	比较认同	比较认同	一般	比较认同	比较认同	比较不认同	比较不认同	一般	比较认同	一般	认同	比较认同	女	18岁-30岁	农村	10年及以下	比较满意	愿意	硕士研究生及以上	事业单位	3万及以下
299	118.73.187.219			2019-07-23 11:00:45	2019-07-23 11:02:32	Unknown Browser	iPhone iOS 12.3.1	1分47秒	正常完成	非常认同	比较认同	比较不认同	比较不认同	不认同	认同	比较认同	非常认同	认同	认同	非常认同	一般	不认同	一般	认同	一般	非常认同	比较认同	认同	非常认同	认同	比较认同	非常不认同	非常认同	比较不认同	男	18岁-30岁	农村	21-30年	比较满意	非常愿意	大学本科	企业单位	7-9万
300	118.73.187.219			2019-07-23 11:02:51	2019-07-23 11:04:37	Unknown Browser	iPhone iOS 12.3.1	1分46秒	正常完成	认同	比较认同	非常认同	一般	一般	不认同	比较不认同	认同	一般	非常认同	比较认同	一般	认同	不认同	比较认同	非常不认同	比较认同	一般	认同	认同	非常认同	认同	一般	比较认同	不认同	女	31~40岁	城镇	10年及以下	比较满意	非常愿意	大学专科	自由个体	4-6万
301	223.104.7.142			2019-07-23 11:19:47	2019-07-23 11:22:59	Unknown Browser	iPhone iOS 10.3.1	3分12秒	正常完成	一般	一般	一般	比较认同	比较不认同	一般	比较不认同	一般	一般	比较不认同	一般	一般	一般	一般	比较认同	一般	一般	比较不认同	比较不认同	比较不认同	一般	一般	比较不认同	一般	比较不认同	女	41~50岁	农村	40年以上	不满意	愿意	初中	务农	3万及以下
302	223.104.7.142			2019-07-23 11:23:41	2019-07-23 11:25:37	Unknown Browser	iPhone iOS 10.3.1	1分56秒	正常完成	不认同	不认同	不认同	一般	一般	非常不认同	不认同	比较不认同	一般	不认同	比较不认同	不认同	比较不认同	一般	一般	一般	一般	一般	不认同	比较不认同	一般	一般	比较不认同	比较不认同	一般	女	51~60岁	农村	40年以上	比较不满意	非常愿意	初中	务农	4-6万
303	223.104.7.120			2019-07-23 11:26:56	2019-07-23 11:27:49	Unknown Browser	iPhone iOS 11.2.5	0分53秒	正常完成	不认同	不认同	不认同	不认同	不认同	不认同	不认同	不认同	不认同	不认同	不认同	不认同	非常不认同	不认同	不认同	不认同	比较不认同	比较不认同	一般	不认同	一般	一般	一般	比较认同	比较认同	男	18岁-30岁	城镇	21-30年	比较不满意	不愿意	硕士研究生及以上	机关单位	13万及以上
304	106.47.230.1			2019-07-23 11:50:58	2019-07-23 11:54:14	Unknown Browser	iPhone iOS 12.3.1	3分16秒	正常完成	一般	比较不认同	一般	一般	一般	比较不认同	一般	一般	一般	比较不认同	一般	一般	一般	比较认同	一般	一般	一般	一般	一般	一般	一般	一般	非常不认同	非常不认同	比较不认同	男	31~40岁	城镇	21-30年	一般	愿意	大学专科	社会团体	4-6万
305	126.204.174.71			2019-07-23 13:16:38	2019-07-23 13:18:16	Unknown Browser	iPhone iOS 12.3.1	1分38秒	正常完成	非常认同	非常认同	非常认同	非常认同	非常认同	非常认同	非常认同	非常认同	非常认同	非常认同	非常认同	非常认同	非常认同	非常认同	非常认同	非常认同	非常认同	非常认同	非常认同	非常认同	非常认同	非常认同	一般	一般	非常认同	男	18岁-30岁	城镇	21-30年	一般	愿意	大学本科	事业单位	7-9万
306	117.136.54.126			2019-07-23 15:54:02	2019-07-23 15:55:21	Unknown Browser	iPhone iOS 12.3.1	1分19秒	正常完成	比较认同	比较不认同	一般	认同	比较认同	比较认同	比较不认同	比较认同	比较认同	比较不认同	比较认同	比较不认同	比较认同	比较认同	一般	比较认同	比较认同	比较不认同	比较不认同	比较不认同	一般	比较不认同	不认同	认同	比较不认同	男	41~50岁	城镇	31-40年	比较满意	比较愿意	大学专科	社会团体	7-9万
307	117.10.158.159			2019-07-23 15:54:24	2019-07-23 15:56:01	Unknown Browser	iPhone iOS 12.2	1分37秒	正常完成	不认同	非常不认同	不认同	一般	不认同	比较不认同	比较不认同	不认同	不认同	非常不认同	非常不认同	一般	一般	一般	不认同	不认同	一般	认同	非常不认同	非常不认同	一般	比较不认同	比较不认同	比较不认同	不认同	女	18岁-30岁	城镇	10年及以下	比较不满意	比较不愿意	硕士研究生及以上	社会团体	10-12万
308	117.10.158.159			2019-07-23 15:56:40	2019-07-23 15:57:50	Unknown Browser	iPhone iOS 12.2	1分10秒	正常完成	不认同	非常不认同	一般	非常不认同	不认同	一般	比较不认同	不认同	非常不认同	非常不认同	比较不认同	非常不认同	不认同	不认同	比较不认同	不认同	非常不认同	非常不认同	非常不认同	不认同	非常不认同	非常不认同	比较不认同	一般	一般	女	18岁-30岁	城镇	10年及以下	比较不满意	不愿意	硕士研究生及以上	社会团体	7-9万
309	223.104.178.109			2019-07-23 15:56:42	2019-07-23 15:59:20	Chrome 66.0.3359.126	Android Linux 9	2分38秒	正常完成	一般	一般	一般	比较认同	一般	比较认同	一般	比较认同	比较认同	比较认同	比较认同	比较认同	比较认同	认同	比较认同	比较认同	比较认同	比较认同	比较认同	一般	一般	认同	比较认同	比较认同	不认同	男	31~40岁	农村	11-20年	一般	比较愿意	高中/中专/技校	自由个体	7-9万
